# Supplementary material for: Improving spin crossover characteristics in heteroleptic [FeIII(qsal-5-I)(qsal-5-OMe)]A complexes
Source: Royal Society of Chemistry journal article supplement (doi:10.1039/d3dt02503a), 2023-01-01
Supplement: d3dt02503a1.pdf [file d3dt02503a1.pdf]

## Improving Spin Crossover Characteristics in Heteroleptic [Fe<sup>III</sup>(qsal-5-I)(qsal-5-OMe)]A Complexes

Raúl Díaz-Torres,<sup>a†</sup> Silvia Gómez-Coca,<sup>b</sup> Eliseo Ruiz,<sup>b</sup>  
Phimphaka Harding<sup>c†</sup> and David J. Harding<sup>c†</sup>

<sup>a</sup> Thammasat University Research Unit in Multifunctional Crystalline Materials and Applications (TU-MCMA), Faculty of Science and Technology, Thammasat University, Pathum Thani 12121, Thailand.

<sup>b</sup> Departament de Química Inorgànica i Orgànica & IQTC-UB, Universitat de Barcelona, Martí i Franquès, 1-11, 08028 Barcelona, Spain

<sup>c</sup> School of Chemistry, Institute of Science, Suranaree University of Technology, Nakhon Ratchasima, 30000, Thailand

† Previous address: Functional Materials and Nanotechnology Centre of Excellence, Walailak University, Thasala, Nakhon Si Thammarat, 80160, Thailand.

| Contents                                                                                                                                                                  | Page<br>No. |
|---------------------------------------------------------------------------------------------------------------------------------------------------------------------------|-------------|
| <b><u>Study of [Fe(qsal-I)(qsal-5-OMe)]A complexes with different anions</u></b>                                                                                          | 4           |
| Table S1: List of Fe <sup>III</sup> systems that exhibit the largest hysteresis.                                                                                          | 4           |
| X-crystallography further discussion                                                                                                                                      | 4           |
| Table S2: Selected Fe-N/O bond length (Å), volume cell (Å <sup>3</sup> ) and octahedral distortion parameters at various temperatures for <b>1-4</b> .                    | 6           |
| Table S3: Crystallographic data and structure refinement of all compounds.                                                                                                | 8           |
| Figure S1: Mass spectrum (ESI <sup>+</sup> ) for <b>1-4</b> .                                                                                                             | 10          |
| Figure S2: Experimental PXRD diffractograms and the corresponding simulated patterns for <b>1-4</b> .                                                                     | 10          |
| Figure S3: Additional cycles $\chi_{MT}$ vs. $T$ plots of <b>1-3</b>                                                                                                      | 13          |
| Figure S4: TGA curves and its derivatives for <b>1-4</b> .                                                                                                                | 14          |
| Figure S5: Plot of the variation of the cell parameter a-axis, b-axis and c-axis at low and high temperature for <b>1-4</b> .                                             | 16          |
| Figure S6: Plot of the variation of the cell volumes at low and high temperature for <b>1-4</b> .                                                                         | 17          |
| Table S4: Intermolecular interactions of all compounds (Å).                                                                                                               | 18          |
| Figure S7: Structural representation of the supramolecular 1D chain for <b>1</b> at 150 K.                                                                                | 20          |
| Figure S8: Structural representation of the supramolecular 1D chain for <b>2</b> at 150 K.                                                                                | 20          |
| Figure S9: Distance between the metal centers in a 1D chain disposition for <b>1</b> and <b>2</b> .                                                                       | 21          |
| Figure S10: 1D chain cross-section for <b>1</b> and <b>2</b> .                                                                                                            | 21          |
| Figure S11: Structural representation of the P4AE interaction in the supramolecular 2D plane of <b>1</b> at 150 K.                                                        | 22          |
| Figure S12: Structural representation of the p-p interaction in the supramolecular 2D plane of <b>2</b> at 150 K.                                                         | 22          |
| Figure S13: Structural representation of the 3D structure with the cations interacting by C-H...I interactions for <b>1</b> and <b>2</b> .                                | 23          |
| Figure S14: Structural representation of the 3D structure of <b>1</b> and <b>2</b> at 150 K.                                                                              | 23          |
| Figure S15: Structural representation of the 3D structure with the interactions of <b>2</b> at 150 K.                                                                     | 24          |
| Figure S16: Structural representation of the 3D structure with the methoxy-iodine groups facing each other ( <b>1</b> and <b>3</b> , top) and shifted ( <b>4</b> bottom). | 25          |
| Figure S17: View of $d_{\text{chain}}$ and $d_{\text{plane}}$ for <b>3</b> and <b>4</b> at 150 K.                                                                         | 26          |
| Table S5: Distances between the chains ( $d_{\text{chain}}$ ) and the planes ( $d_{\text{plane}}$ ) at different temperatures.                                            | 27          |
| Table S6: Angle between the 1D chains ( $\theta^\circ$ ) and N-Fe-N angles ( $\theta^\circ$ ).                                                                            | 28          |

|                                                                                                                                                                                                       |    |
|-------------------------------------------------------------------------------------------------------------------------------------------------------------------------------------------------------|----|
| <b><u>Comparison of [Fe(qsal-l)(qsal-5-OMe)]OTf with the homoleptic complexes</u></b>                                                                                                                 | 29 |
| Table S7: Selected Fe-N/O bond length (Å), volume cell (Å <sup>3</sup> ) and octahedral distortion parameters at various temperatures for <b>4-6</b> .                                                | 29 |
| Table S8: Crystallographic data and structure refinement for <b>4-6</b> .                                                                                                                             | 30 |
| Figure S18: $\chi_{MT}$ vs. $T$ plots of <b>6</b> .                                                                                                                                                   | 31 |
| Figure S19: Structural representation of the channel in the 3D structure where the DCM solvent is located for <b>6</b> .                                                                              | 31 |
| Table S9: Intermolecular interactions for <b>5-7</b> (Å).                                                                                                                                             | 32 |
| Figure S20: Structural representation of the supramolecular 1D chain for <b>4-6</b> at 150 K.                                                                                                         | 33 |
| Figure S21: Structural representation of the supramolecular 2D plane for <b>4-6</b> at 150 K.                                                                                                         | 34 |
| Figure S22: Structural representation of the 3D structure for <b>4-6</b> at 150 K.                                                                                                                    | 35 |
| Table S10: Distances between the chains ( $d_{\text{chain}}$ ) and the planes ( $d_{\text{plane}}$ ) at different temperatures for <b>4-6</b> .                                                       | 36 |
| Figure S23: View of $d_{\text{chain}}$ (horizontal) and $d_{\text{plane}}$ (vertical) for <b>4-6</b> at 150 K                                                                                         | 37 |
| Figure S24: Plot of the variation of the cell parameter a-axis, b-axis and c-axis at low and high temperature for <b>4-6</b> .                                                                        | 38 |
| Figure S25: Plot of the variation of the cell volumes at low and high temperature for <b>4-6</b> .                                                                                                    | 39 |
| Figure S26: Interactions of the OTf anion within the 1D chain. Comparison of the different arrangement of the anion with the 1D chain cross-section for <b>4-6</b> .                                  | 40 |
| Figure S27: Hirshfeld surface 2D fingerprint plots for <b>4-6</b> at 150 K.                                                                                                                           | 41 |
| Table S11: Intermolecular interactions contributions for <b>1-6</b> calculated by Hirshfeld surface at different temperatures.                                                                        | 42 |
| Figure S28: Experimental PXRD diffractograms for <b>4</b> at room temperature and after heating at 400 K.                                                                                             | 43 |
| Table S12: Summary of SCO features of the homoleptic and heteroleptic complexes within the family                                                                                                     | 44 |
| Table S13: Comparison of DFT optimized average metal-ligand bond lengths (Å) and volume cells (Å <sup>3</sup> ) for the studied systems. The available experimental data is indicated in parenthesis. | 45 |
| Figure S29: View of $d_{\text{chain}}$ (horizontal) and $d_{\text{plane}}$ (vertical) and interactions for <b>4</b> (experimental) and <b>4-desolv</b> (simulated) in the LS state.                   | 46 |
| Figure S30: Comparison of $\pi$ - $\pi$ interactions in <b>4</b> (LS state) (left) and <b>4-desolv</b> (LS state) (right).                                                                            | 46 |
| Table S14: Distances between the chains ( $d_{\text{chain}}$ ) and the planes ( $d_{\text{plane}}$ ) at different spin state                                                                          | 47 |
| Table S15: Cell parameter $a$ -axis, $b$ -axis and $c$ -axis (Å) at different spin state                                                                                                              | 47 |
| Table S16: Angle between the ligands                                                                                                                                                                  | 47 |
| References                                                                                                                                                                                            | 43 |

## Study of [Fe(qsal-I)(qsal-5-OMe)](A) complexes with different anions

**Table S1.** List of Fe<sup>III</sup> systems that exhibit significant hysteresis.

| Iron(III) Complex                                                            | $\Delta T$ hysteresis | Ref       |
|------------------------------------------------------------------------------|-----------------------|-----------|
| [Fe <sup>III</sup> (qsal) <sub>2</sub> ]NCSe·CH <sub>2</sub> Cl <sub>2</sub> | 76 K                  | 1         |
| $\beta$ -[Fe(qsal) <sub>2</sub> ]I <sub>3</sub>                              | 25 K                  | 2         |
| [Fe <sup>III</sup> (qnal-OMe) <sub>2</sub> ]BPh <sub>4</sub> ·2MeOH          | 110 K                 | 3         |
| [Fe <sup>III</sup> (qsal-I) <sub>2</sub> ]OTf                                | 8 K                   | 4         |
| [Fe <sup>III</sup> (H-5-Cl-thsa-Et)(5-Cl-thsa-Et)]·H <sub>2</sub> O          | 51 K                  | 5         |
| K[Fe(5-Br-thsa) <sub>2</sub> ]                                               | 52 K                  | 6         |
| [Fe <sup>III</sup> (qsal-5-OMe)(qsal-I)]OTf                                  | 35 K                  | This work |
| [Fe <sup>III</sup> (qsal-I) <sub>2</sub> ]NTf <sub>2</sub>                   | 34 K                  | 7         |
| [Fe <sup>III</sup> (naphBen) <sub>2</sub> ]I                                 | 30 K*                 | 8         |

\*hidden hysteresis

### X-ray crystallography further discussion

As noted in the main paper the structures contain disorder of the iodo and methoxy groups. To model this disorder required the iodo and methoxy groups to be split into two parts with occupancies initially refined and then (with the exception of **2**), fixed at values close to those found from the refinement. In all cases DFIX restraints were used for the methoxy groups with the C(aromatic)-O bond set to be 1.38 Å, while the O-CH<sub>3</sub> bond was set to 1.42 Å, with 0.02 Å allowed deviation. In some of the structures the aromatic rings to which the iodo and methoxy groups are attached were also found to be disordered and SADI restraints were applied. More specific details for each structure are given below.

For **1**, the occupancies for the two ligands refine close to 50% at both temperatures and hence the occupancies were fixed at 0.5. The methoxy groups were refined isotropically as anisotropic refinement gave unreasonable ellipsoids. At 300 K the methoxy groups were also constrained with an EADP restraint.

In **2**, the refined occupancies for one of the rings were found to be 0.48 and 0.52 on one of the ligands and 0.34 and 0.66 on the other ligand, indicating an excess of the qsal-5-OMe ligand in the crystal structure. EADP constraints were applied to the methoxy groups and RIGU restraints on the disordered salicylaldimine aromatic carbons. Anisotropic refinement of the NCS<sup>-</sup> anion gave strongly elongated ellipsoids indicating possible disorder in the anion. Attempts to model this disorder did not prove effective, possibly due to the proximity of a nearby inversion center. Consequently, we opted to refine the anion isotropically and with full occupancy.

For the BF<sub>4</sub> complex, **3**, the two ligands refine as 0.4 and 0.6 on one of the ligands and 0.6 and 0.4 on the other ligand, meaning that there is a 1:1 ratio overall. The methoxy groups are refined as isotropic with EADP constraints at 150 K. At 300 K only the O3-C33 methoxy group is isotropic, again requiring an EADP constraint. In both structures only the aromatic rings with the O3-C33 methoxy group are disordered with the aromatic carbons refined isotropically. At low temperature the MeOH molecule refines to *ca.* 0.8 occupancy. However, there are a small number of low intensity Q-peaks close to the MeOH that suggest additional solvent molecules may be present, most probably MeOH. Application of a solvent mask was necessary at 300 K and indicates that there are 1.1 MeOH molecules in the structure and this was used in the description of the compound in the main paper.

In **4**, the refined occupancies for one of the rings were found to be 0.48 and 0.52 on one of the ligands and 0.41 and 0.59 on the other ligand, indicating an excess of the qsal-5-I ligand in the crystal structure. As in **2**, EADP constraints were applied to the methoxy groups. At 280 K the methoxy groups are refined isotropically with an EADP constraint applied to the O3-C33 atoms. RIGU restraints were applied to the C12→C15 and C12A→C15A atoms.

In the structure of **6** at 280 K the CH<sub>2</sub>Cl<sub>2</sub> molecule was disordered over two positions, in a 40% to 60% ratio. Although the ellipsoids are a little larger than is ideal, application of a solvent mask reveals that 1 equivalent of CH<sub>2</sub>Cl<sub>2</sub> is expected and hence the model is reasonable.

**Table S2** Selected Fe-N/O bond length (Å), volume cell (Å<sup>3</sup>) and octahedral distortion parameters at various temperatures for **1-4**.

|                             | [Fe(qsal-5-OMe)(qsal-I)]NO <sub>3</sub> ·2MeOH <b>1</b> |          | [Fe(qsal-5-OMe)(qsal-I)]NCS MeOH·H <sub>2</sub> O <b>2</b> |
|-----------------------------|---------------------------------------------------------|----------|------------------------------------------------------------|
|                             | 150 K                                                   | 300 K    | 150 K                                                      |
| <b>Fe1-O1ph</b>             | 1.868(4)                                                | 1.918(4) | 1.912(5)                                                   |
| <b>Fe1-O2ph</b>             | 1.884(4)                                                | 1.901(4) | 1.898(4)                                                   |
| <b>Fe1-Oph<sub>av</sub></b> | 1.876                                                   | 1.910    | 1.900                                                      |
| <b>Fe1-N1quin</b>           | 2.026(4)                                                | 2.113(4) | 2.158(4)                                                   |
| <b>Fe1-N2im</b>             | 1.988(5)                                                | 2.088(4) | 2.117(5)                                                   |
| <b>Fe1-N3quin</b>           | 2.026(4)                                                | 2.135(4) | 2.167(4)                                                   |
| <b>Fe1-N4im</b>             | 1.984(5)                                                | 2.078(5) | 2.127(5)                                                   |
| <b>Fe1-N<sub>av</sub></b>   | 2.006                                                   | 2.103    | 2.142                                                      |
| <b>V / Å<sup>3</sup></b>    | 1644                                                    | 1687     | 1634                                                       |
| <b>Σ-Fe1, Fe2</b>           | 43                                                      | 60       | 71                                                         |
| <b>⊖-Fe1, Fe2</b>           | 126                                                     | 213      | 272                                                        |
| <b>Spin State</b>           | LS                                                      | HS       | HS                                                         |

|                             | [Fe(qsal-5-OMe)(qsal-I)]BF <sub>4</sub> ·MeOH <b>3</b> |              | [Fe(qsal-5-OMe)(qsal-I)]OTf·MeOH <b>4</b> |              |
|-----------------------------|--------------------------------------------------------|--------------|-------------------------------------------|--------------|
|                             | <b>150 K</b>                                           | <b>300 K</b> | <b>150 K</b>                              | <b>280 K</b> |
| <b>Fe1-O1ph</b>             | 1.872(2)                                               | 1.889(2)     | 1.880(4)                                  | 1.900(4)     |
| <b>Fe1-O2ph</b>             | 1.878(2)                                               | 1.898(2)     | 1.877(3)                                  | 1.908(3)     |
| <b>Fe1-Oph<sub>av</sub></b> | 1.875                                                  | 1.894        | 1.879                                     | 1.904        |
| <b>Fe1-N1quin</b>           | 1.982(3)                                               | 2.115(2)     | 1.980(5)                                  | 2.130(4)     |
| <b>Fe1-N2im</b>             | 1.961(2)                                               | 2.059(3)     | 1.949(6)                                  | 2.086(5)     |
| <b>Fe1-N3quin</b>           | 1.969(2)                                               | 2.092(2)     | 1.977(3)                                  | 2.122(4)     |
| <b>Fe1-N4im</b>             | 1.937(2)                                               | 2.057(2)     | 1.945(7)                                  | 2.093(5)     |
| <b>Fe1-N<sub>av</sub></b>   | 1.962                                                  | 2.081        | 1.962                                     | 2.107        |
| <b>V / Å<sup>3</sup></b>    | 1606                                                   | 1649         | 1679                                      | 1739         |
| <b>Σ-Fe1, Fe2</b>           | 48                                                     | 58           | 46                                        | 58           |
| <b>⊖-Fe1, Fe2</b>           | 124                                                    | 190          | 118                                       | 213          |
| <b>Spin state</b>           | LS                                                     | HS           | LS                                        | HS           |

**Table S3** Crystallographic data and structure refinement for **1-4**.

|                                                 | [Fe(qsal-5-OMe)(qsal-I)]NO <sub>3</sub> ·2MeOH <b>1</b>           |                                                                   | [Fe(qsal-5-OMe)(qsal-I)]NCS·MeOH·H <sub>2</sub> O <b>2</b>         |
|-------------------------------------------------|-------------------------------------------------------------------|-------------------------------------------------------------------|--------------------------------------------------------------------|
|                                                 | <b>150 K</b>                                                      | <b>300 K</b>                                                      | <b>150 K</b>                                                       |
| <b>Empirical formula</b>                        | C <sub>33</sub> H <sub>23</sub> N <sub>5</sub> O <sub>6</sub> FeI | C <sub>33</sub> H <sub>23</sub> N <sub>5</sub> O <sub>6</sub> FeI | C <sub>35</sub> H <sub>29</sub> FeIN <sub>5</sub> O <sub>5</sub> S |
| <b>Formula weight/ gmol<sup>-1</sup></b>        | 768.31                                                            | 768.31                                                            | 814.44                                                             |
| <b>Crystal system</b>                           | triclinic                                                         | triclinic                                                         | triclinic                                                          |
| <b>Space group</b>                              | P $\bar{1}$                                                       | P $\bar{1}$                                                       | P $\bar{1}$                                                        |
| <b>a / Å</b>                                    | 12.0122(3)                                                        | 11.9974(7)                                                        | 10.7785(3)                                                         |
| <b>b / Å</b>                                    | 12.2552(2)                                                        | 12.4166(6)                                                        | 12.6165(4)                                                         |
| <b>c / Å</b>                                    | 12.7554(2)                                                        | 12.9275(5)                                                        | 13.9032(5)                                                         |
| <b>α / °</b>                                    | 80.399(2)                                                         | 79.464(4)                                                         | 66.070(3)                                                          |
| <b>β / °</b>                                    | 69.404(2)                                                         | 69.435(5)                                                         | 74.702(3)                                                          |
| <b>γ / °</b>                                    | 69.419(2)                                                         | 69.693(5)                                                         | 73.722(3)                                                          |
| <b>Cell volume / Å<sup>3</sup></b>              | 1643.55(6)                                                        | 1686.90(16)                                                       | 1634.41(10)                                                        |
| <b>Z</b>                                        | 2                                                                 | 2                                                                 | 2                                                                  |
| <b>Absorption coefficient / mm<sup>-1</sup></b> | 11.484                                                            | 11.283                                                            | 12.141                                                             |
| <b>Reflections collected</b>                    | 25178                                                             | 19654                                                             | 25047                                                              |
| <b>Independent reflections, R<sub>int</sub></b> | 6004, 0.0966                                                      | 6143, 0.1093                                                      | 5964, 0.0836                                                       |
| <b>Max. and min. transmission</b>               | 0.531/0.062                                                       | 1/0.127                                                           | 0.329/0.081                                                        |
| <b>Restraints/parameters</b>                    | 4/479                                                             | 0/446                                                             | 22/458                                                             |
| <b>Final R indices [I ≥ 2σ (I)]</b>             | 0.0648                                                            | 0.1125                                                            | 0.0865                                                             |
| <b>R<sub>1</sub>, wR<sub>2</sub></b>            | 0.1773                                                            | 0.3133                                                            | 0.2439                                                             |
| <b>CCDC No.</b>                                 | 2281918                                                           | 2281919                                                           | 2282219                                                            |



|                                                 | [Fe(qsal-5-OMe)(qsal-I)]BF <sub>4</sub> ·MeOH <b>3</b>                           |                                                                                  | [Fe(qsal-5-OMe)(qsal-I)]OTf·MeOH <b>4</b>                                         |                                                                                   |
|-------------------------------------------------|----------------------------------------------------------------------------------|----------------------------------------------------------------------------------|-----------------------------------------------------------------------------------|-----------------------------------------------------------------------------------|
|                                                 | <b>150 K</b>                                                                     | <b>300 K</b>                                                                     | <b>150 K</b>                                                                      | <b>280 K</b>                                                                      |
| <b>Empirical formula</b>                        | C <sub>34</sub> H <sub>27</sub> BF <sub>4</sub> FeIN <sub>4</sub> O <sub>4</sub> | C <sub>34</sub> H <sub>27</sub> BF <sub>4</sub> FeIN <sub>4</sub> O <sub>4</sub> | C <sub>35</sub> H <sub>27</sub> F <sub>3</sub> FeIN <sub>4</sub> O <sub>7</sub> S | C <sub>35</sub> H <sub>27</sub> F <sub>3</sub> FeIN <sub>4</sub> O <sub>7</sub> S |
| <b>Formula weight/ gmol<sup>-1</sup></b>        | 825.15                                                                           | 825.15                                                                           | 887.41                                                                            | 887.41                                                                            |
| <b>Crystal system</b>                           | triclinic                                                                        | triclinic                                                                        | triclinic                                                                         | triclinic                                                                         |
| <b>Space group</b>                              | P $\bar{1}$                                                                      | P $\bar{1}$                                                                      | P $\bar{1}$                                                                       | P $\bar{1}$                                                                       |
| <b>a / Å</b>                                    | 10.7366(3)                                                                       | 10.8316(5)                                                                       | 12.2770(4)                                                                        | 11.9334(2)                                                                        |
| <b>b / Å</b>                                    | 12.3118(2)                                                                       | 12.4983(6)                                                                       | 12.4031(5)                                                                        | 12.6849(2)                                                                        |
| <b>c / Å</b>                                    | 12.7998(3)                                                                       | 12.8260(8)                                                                       | 12.7647(6)                                                                        | 13.1443(4)                                                                        |
| <b>α / °</b>                                    | 103.907(2)                                                                       | 104.192(5)                                                                       | 68.856(4)                                                                         | 71.125(2)                                                                         |
| <b>β / °</b>                                    | 98.433(2)                                                                        | 99.345(4)                                                                        | 86.751(3)                                                                         | 86.434(2)                                                                         |
| <b>γ / °</b>                                    | 96.219(2)                                                                        | 94.337(4)                                                                        | 68.419(4)                                                                         | 67.786(2)                                                                         |
| <b>Cell volume / Å<sup>3</sup></b>              | 1606.35(7)                                                                       | 1648.87(16)                                                                      | 1679.29(13)                                                                       | 1738.87(7)                                                                        |
| <b>Z</b>                                        | 2                                                                                | 2                                                                                | 2                                                                                 | 2                                                                                 |
| <b>Absorption coefficient / mm<sup>-1</sup></b> | 11.917                                                                           | 11.610                                                                           | 12.047                                                                            | 11.634                                                                            |
| <b>Reflections collected</b>                    | 24251                                                                            | 24981                                                                            | 25194                                                                             | 27210                                                                             |
| <b>Independent reflections, R<sub>int</sub></b> | 5873, 0.0752                                                                     | 5993, 0.0638                                                                     | 6140, 0.0848                                                                      | 6347                                                                              |
| <b>Max. and min. transmission</b>               | 0.519/0.168                                                                      | 0.584/0.180                                                                      | 0.508/0.038                                                                       | 0.358/0.044                                                                       |
| <b>Restraints/parameters</b>                    | 9/463                                                                            | 18/473                                                                           | 3/490                                                                             | 0/481                                                                             |
| <b>Final R indices [I ≥ 2σ (I)]</b>             | 0.0996                                                                           | 0.0905                                                                           | 0.0690                                                                            | 0.0698                                                                            |
| <b>R<sub>1</sub>, wR<sub>2</sub></b>            | 0.2821                                                                           | 0.2679                                                                           | 0.1675                                                                            | 0.1971                                                                            |
| <b>CCDC No.</b>                                 | 2281920                                                                          | 2281921                                                                          | 2281922                                                                           | 2281923                                                                           |

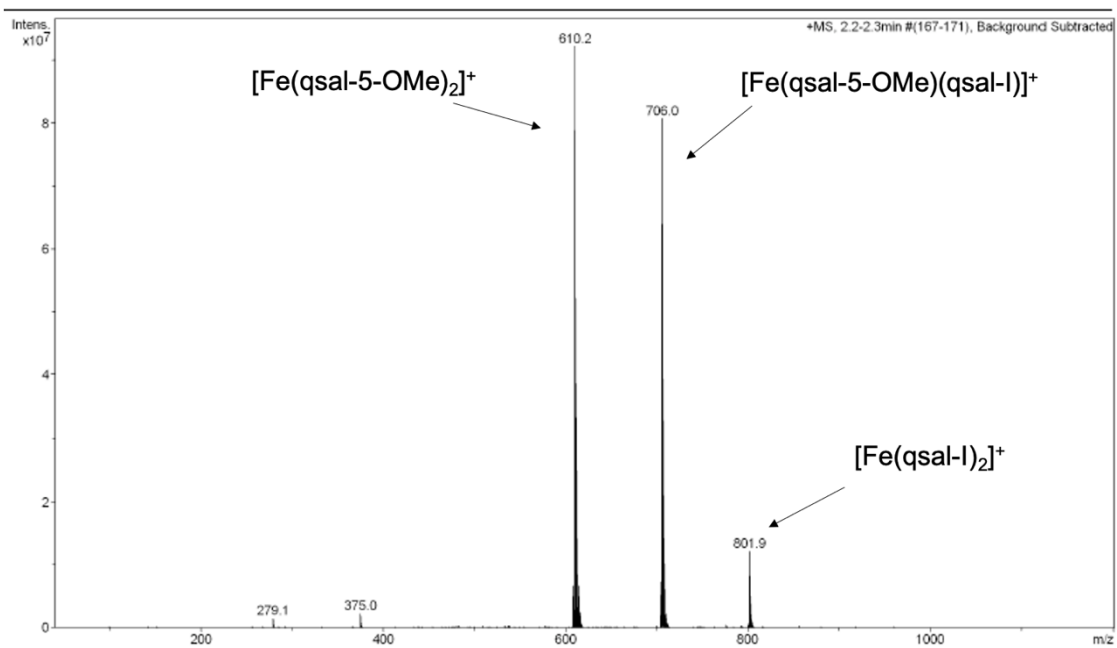

Figure S1. Mass spectrum (ESI<sup>+</sup>) for 1-4.

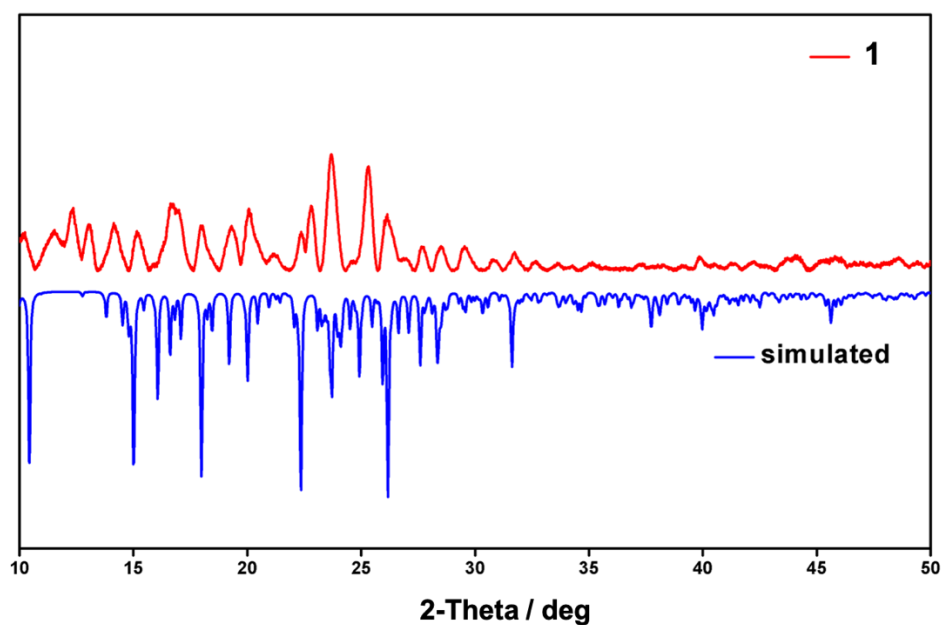

[Fe(qsal-5-OMe)(qsal-I)]NO<sub>3</sub> 1.

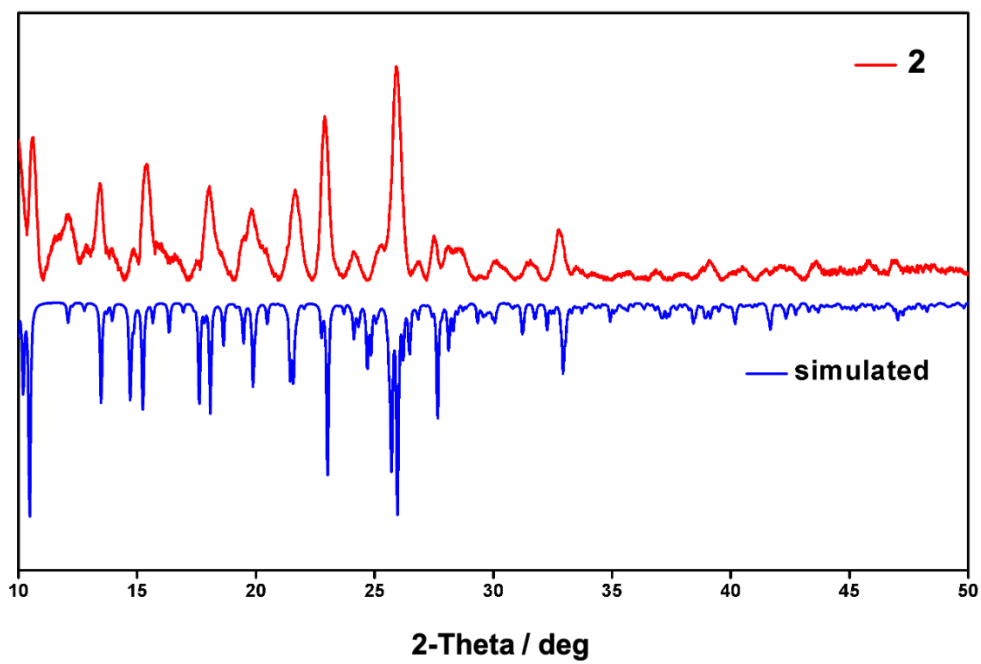

[Fe(qsal-5-OMe)(qsal-1)]NCS 2.

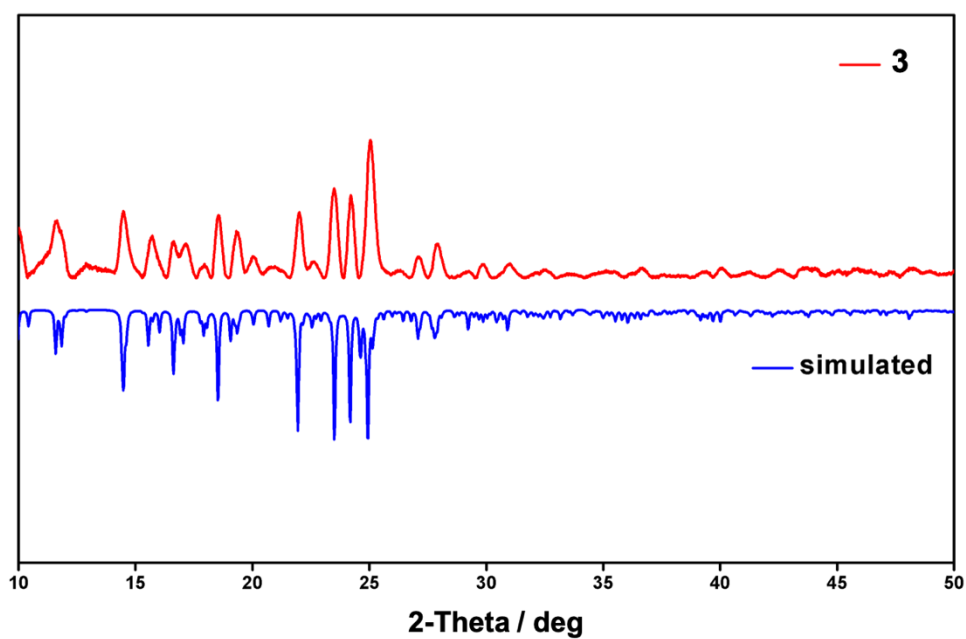

[Fe(qsal-5-OMe)(qsal-1)]BF<sub>4</sub> 3.

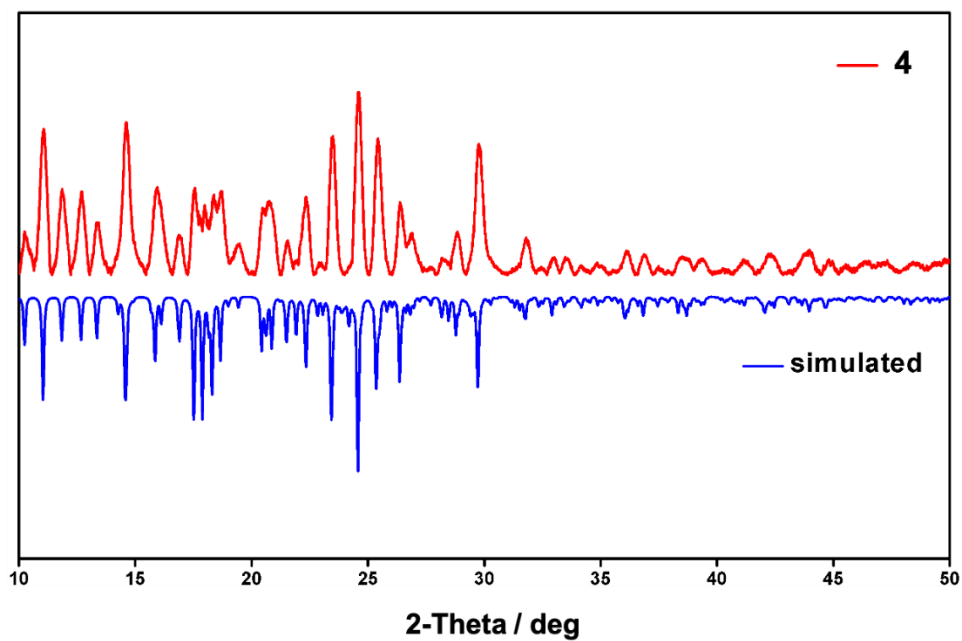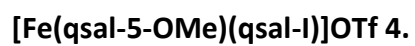

**Figure S2** Experimental PXRD diffractograms (blue) and the corresponding simulated patterns (red) for **1-4**.

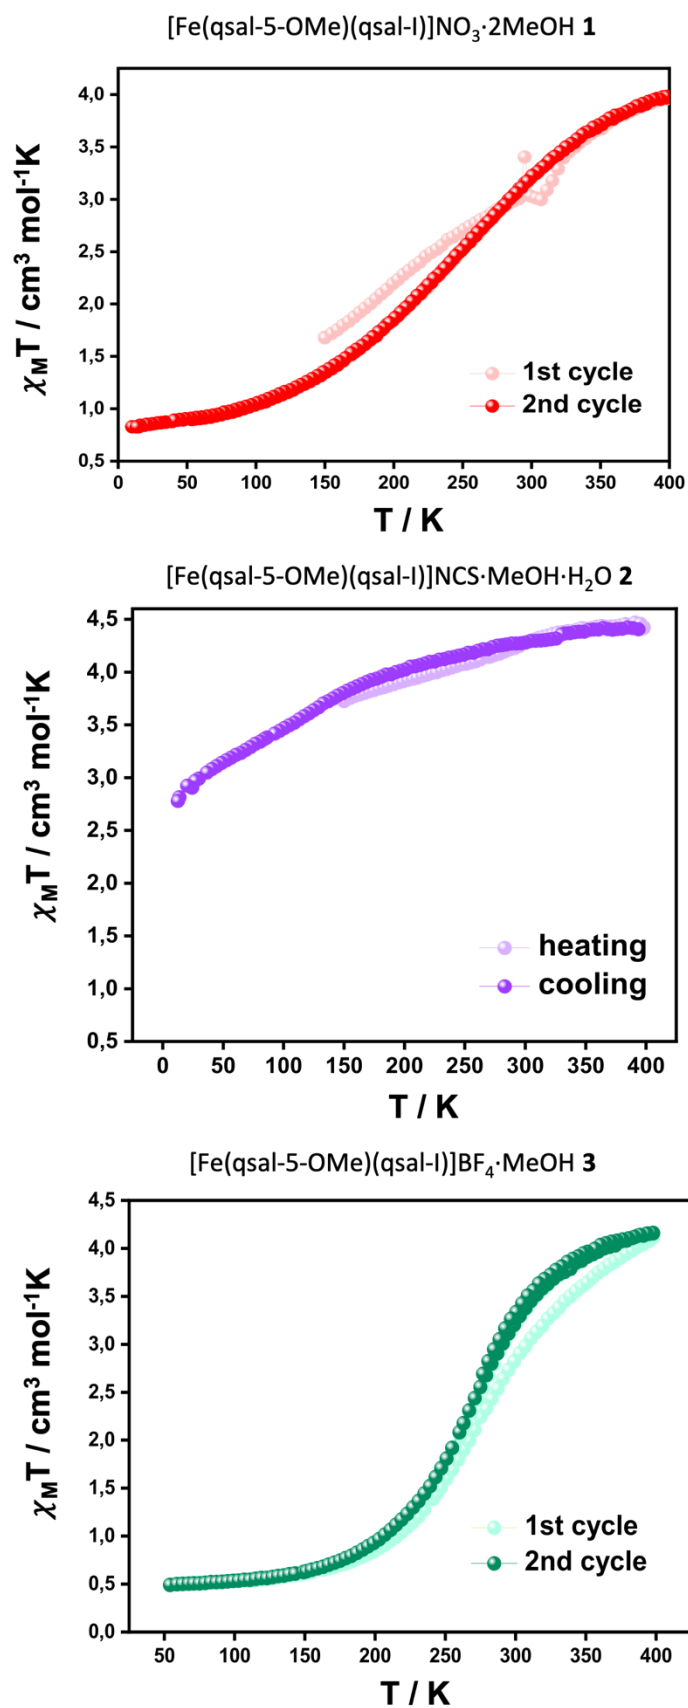

**Figure S3** Additional cycles  $\chi_M T$  vs.  $T$  plots of **1-3**.

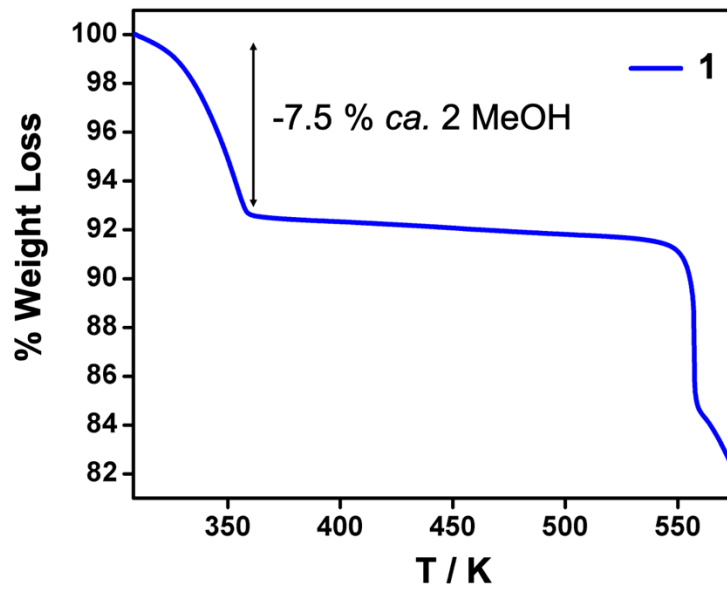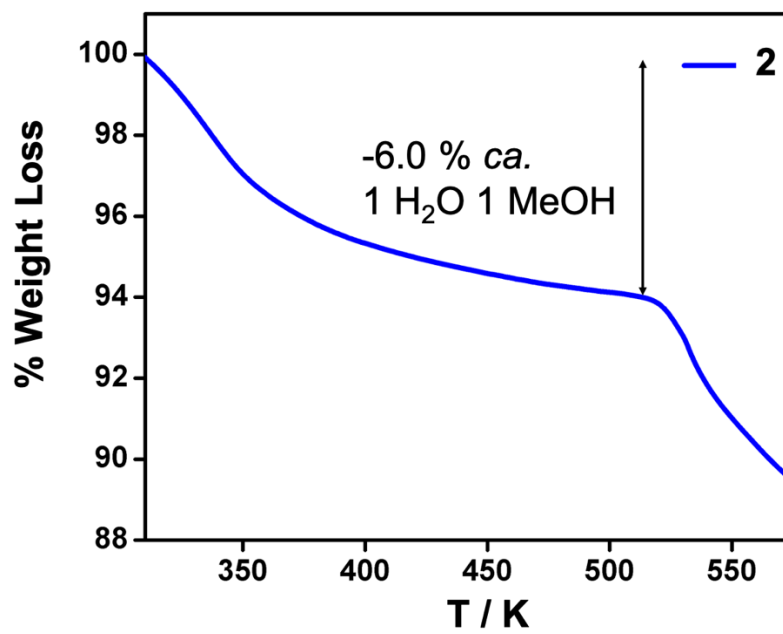

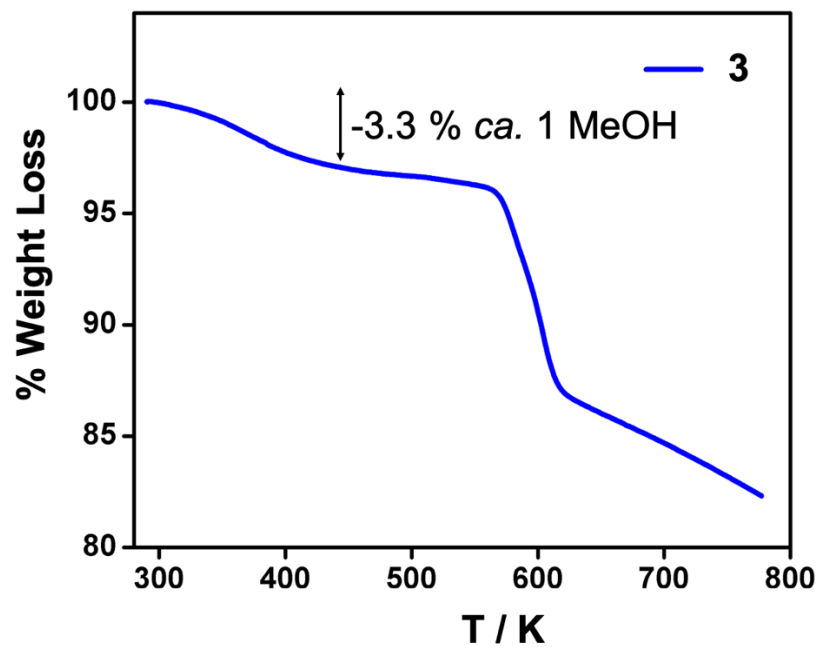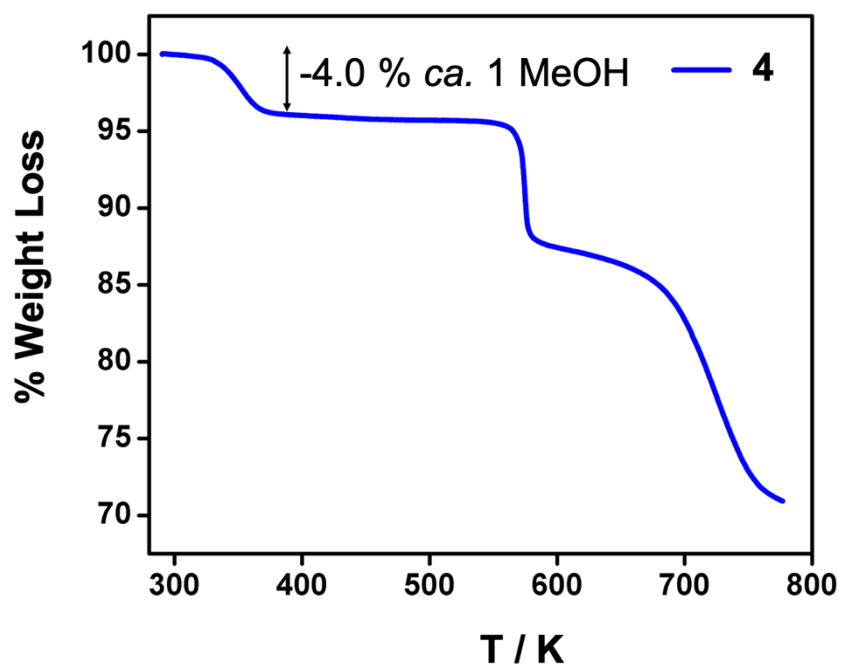

Figure S4 TGA curves for 1-4.

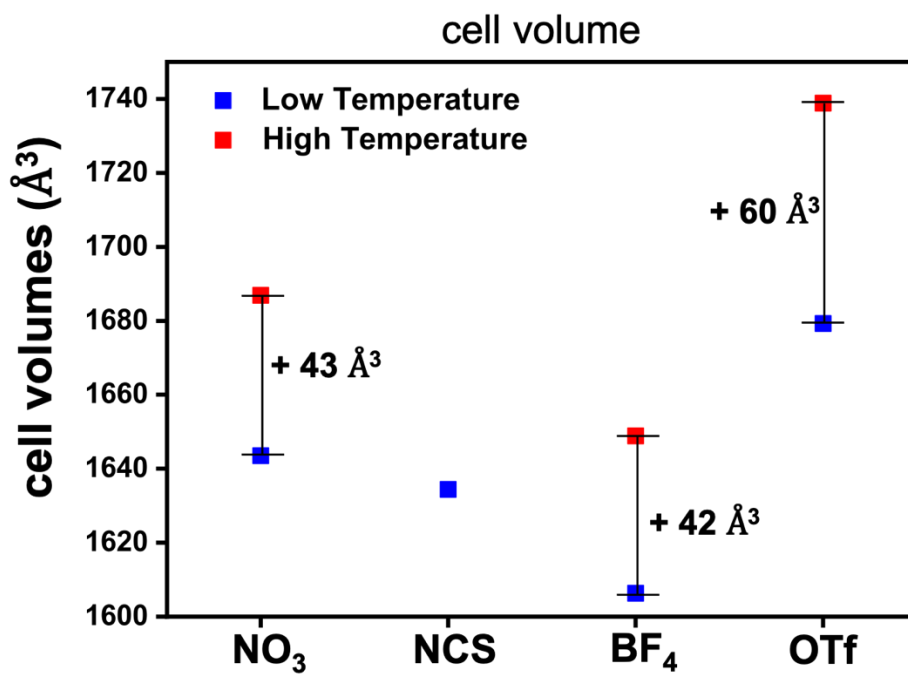

**Figure S5:** Plot of the variation of the cell volume at low (blue) and high (red) temperature for 1-4.



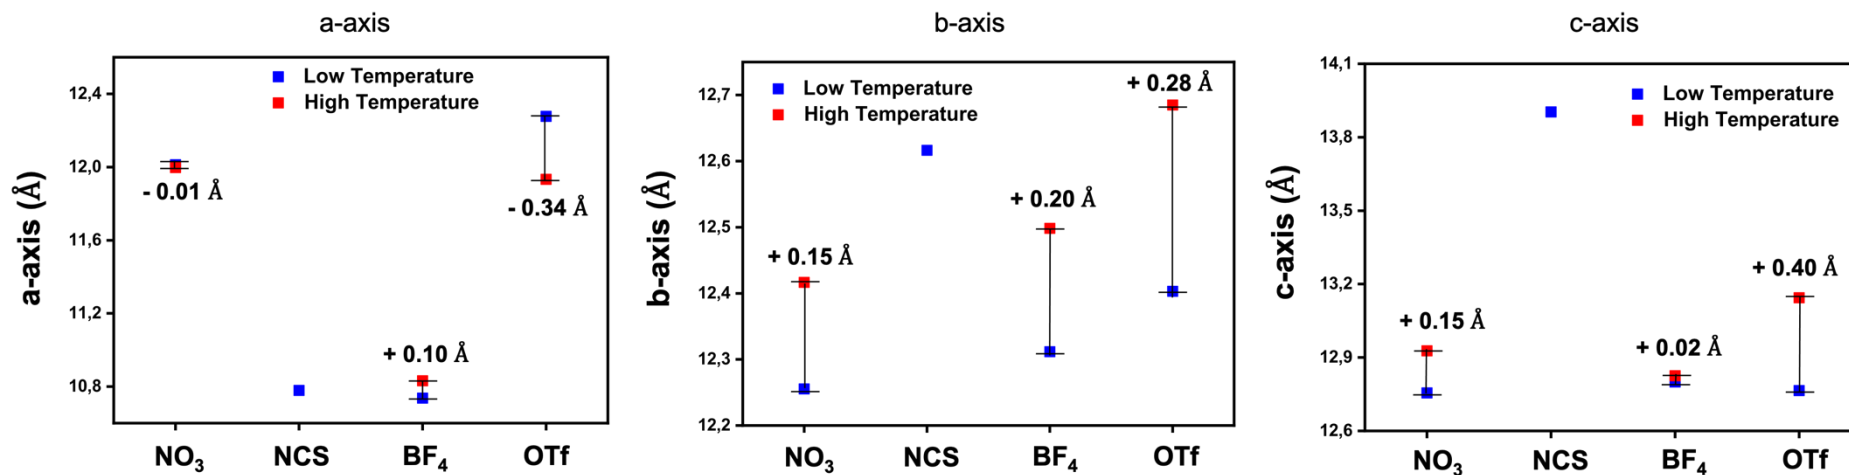

**Figure S6:** Plot of the variation of the cell parameter a-axis, b-axis and c-axis at low (blue) and high (red) temperature for 1-4.

**Table S4** Intermolecular interactions for **1-4** (Å).

|                            |                                    | [Fe(qsal-5-OMe)(qsal-I)]NO <sub>3</sub> ·2MeOH <b>1</b> |              | [Fe(qsal-5-OMe)(qsal-I)]NCS<br>MeOH·H <sub>2</sub> O <b>2</b> |
|----------------------------|------------------------------------|---------------------------------------------------------|--------------|---------------------------------------------------------------|
|                            |                                    | <b>150 K</b>                                            | <b>300 K</b> | <b>150 K</b>                                                  |
| <b><u>1D chains</u></b>    |                                    |                                                         |              |                                                               |
| <b>Fe-Fe</b>               |                                    |                                                         |              |                                                               |
|                            | $\pi$ - $\pi$ (C10-C10)            | 3.287                                                   | 3.450        | 3.444                                                         |
|                            | $\pi$ - $\pi$ (C28-C24)            | 3.181                                                   | 3.228        | 3.388                                                         |
|                            | C-H...O (H10-O2)                   | 2.640                                                   | 2.580        | -                                                             |
|                            | C <sub>aromatic</sub> ...I (C4-I1) | 3.631                                                   | 3.672        | -                                                             |
|                            | Fe-Fe (Type A)                     | 6.862                                                   | 6.832        | 6.785                                                         |
|                            | Fe-Fe (Type B)                     | 7.226                                                   | 7.260        | 8.967                                                         |
| <b><u>2D plane</u></b>     |                                    |                                                         |              |                                                               |
|                            | $\pi$ - $\pi$ (P4AE) (C1-C2)       | 3.361                                                   | 3.415        | 3.380                                                         |
|                            | C-H... $\pi$ (P4AE) (H3-centr)     | 2.624                                                   | 2.672        | 3.281                                                         |
|                            | $\pi$ ...O                         | -                                                       | -            | 3.936                                                         |
|                            | C-H...C-H                          | -                                                       | -            | 2.782                                                         |
| <b><u>3D structure</u></b> |                                    |                                                         |              |                                                               |
|                            | C <sub>arom</sub> ...I (C12-I2)    | 3.020                                                   | -            | 3.563                                                         |
|                            | C-H...p                            | -                                                       | -            | 2.797                                                         |
| <b>Anion</b>               | X...CH                             | -                                                       | -            |                                                               |
|                            | O...CH                             | 2.679                                                   | 3.057        |                                                               |
|                            | S...CH                             | -                                                       | -            |                                                               |
|                            |                                    |                                                         |              | 3.379                                                         |
| <b>Solvent</b>             |                                    | 1.877                                                   | 3.223        | 2.794                                                         |

|                            |                                    | [Fe(qsal-5-OMe)(qsal-I)]BF <sub>4</sub> ·MeOH <b>3</b> |              | [Fe(qsal-5-OMe)(qsal-I)]OTf·MeOH <b>4</b> |              |
|----------------------------|------------------------------------|--------------------------------------------------------|--------------|-------------------------------------------|--------------|
|                            |                                    | <b>150 K</b>                                           | <b>300 K</b> | <b>150 K</b>                              | <b>280 K</b> |
| <b><u>1D chains</u></b>    |                                    |                                                        |              |                                           |              |
| <b>Fe-Fe</b>               |                                    |                                                        |              |                                           |              |
|                            | $\pi$ - $\pi$ (C10-C10)            | 3.274                                                  | 3.387        | 3.260                                     | 3.397        |
|                            | $\pi$ - $\pi$ (C28-C24)            | 3.166                                                  | 3.226        | 3.395                                     | 3.355        |
|                            | C-H...O (H10-O2)                   | 2.533                                                  | 2.552        | 2.534                                     | 2.531        |
|                            | C <sub>aromatic</sub> ...I (C4-I1) | -                                                      | -            | -                                         | -            |
|                            | Fe-Fe (Type A)                     | 6.880                                                  | 6.851        | 6.796                                     | 6.754        |
|                            | Fe-Fe (Type B)                     | 7.088                                                  | 7.072        | 6.980                                     | 6.895        |
| <b><u>2D plane</u></b>     |                                    |                                                        |              |                                           |              |
|                            | $\pi$ - $\pi$ (P4AE) (C1-C2)       | -                                                      | -            | 3.404                                     | 3.450        |
|                            | C-H... $\pi$ (P4AE) (H3-centr)     | -                                                      | -            | 2.509                                     | 2.559        |
|                            | C-H...O                            | -                                                      | -            | -                                         | -            |
|                            | O...I                              | -                                                      | -            | -                                         | -            |
| <b><u>3D structure</u></b> |                                    |                                                        |              |                                           |              |
|                            | C <sub>arom</sub> ...I (C12-I2)    | -                                                      | -            | -                                         | -            |
|                            | C-H... $\pi$                       | -                                                      | -            | -                                         | -            |
| <b>Anion</b>               |                                    |                                                        |              |                                           |              |
|                            | X...CH                             | 2.512                                                  | 2.709        | -                                         | -            |
|                            | O...CH                             | -                                                      | -            | 3.144                                     | 3.030        |
|                            | S...CH                             | -                                                      | -            | 2.507                                     | 2.602        |
| <b>Solvent</b>             |                                    |                                                        |              |                                           |              |
|                            |                                    | 3.191                                                  | 3.137        | 2.639                                     | 2.678        |

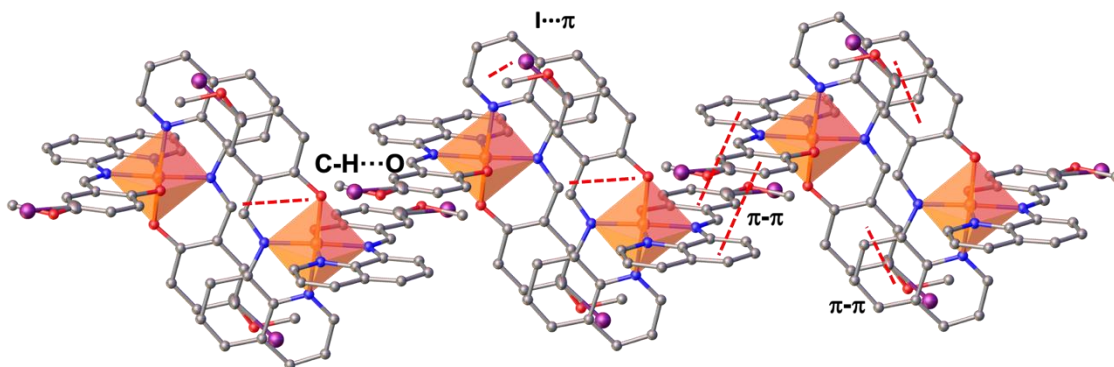

**Figure S7:** Structural representation of the supramolecular 1D chain for **1** at 150 K.

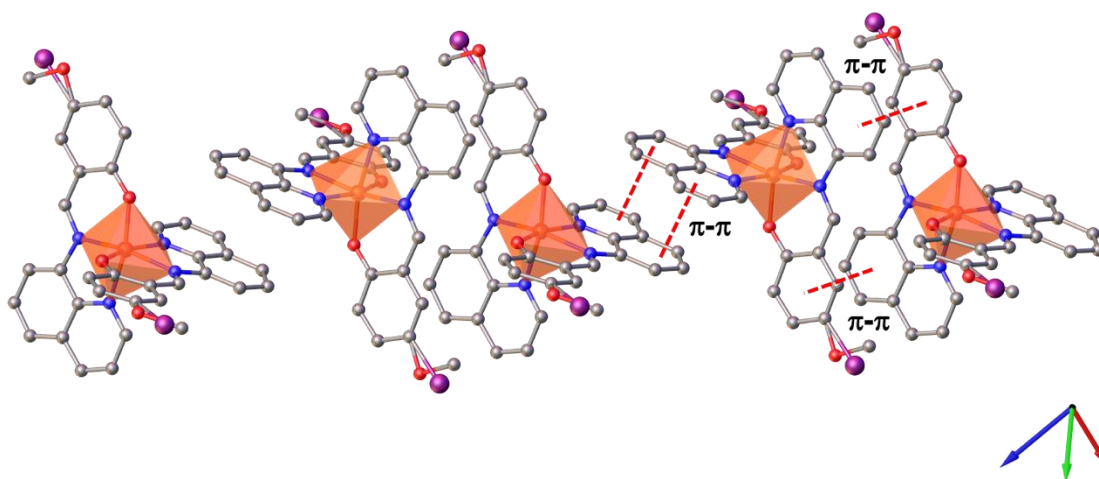

**Figure S8:** Structural representation of the supramolecular 1D chain for **2** at 150 K.

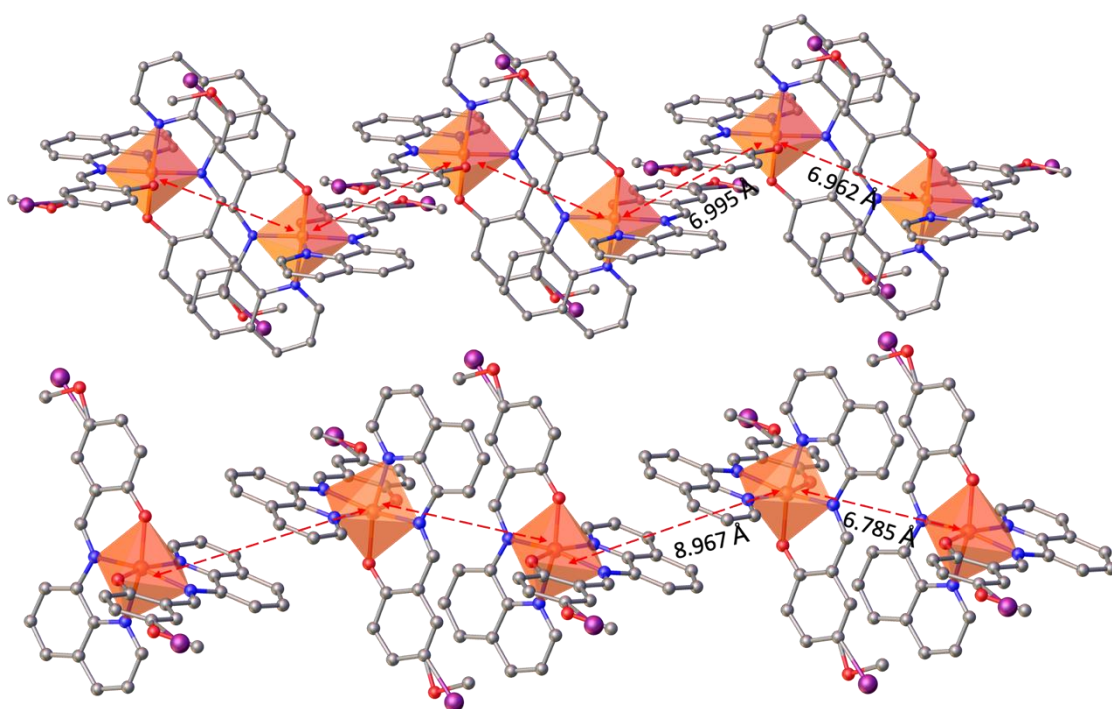

**Figure S9:** Distance between the metal centers in a 1D chain disposition for **1** (top) and **2** (bottom).

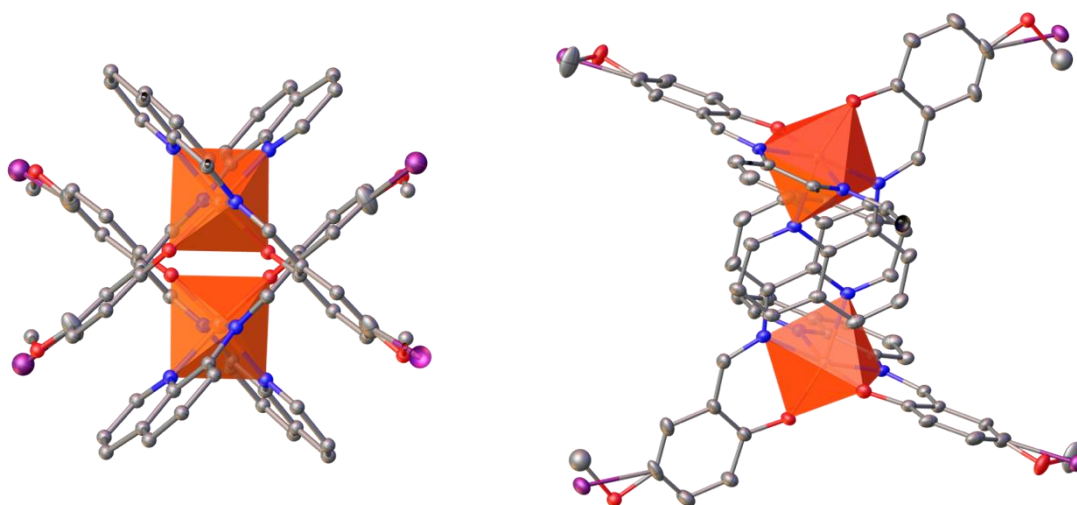

**Figure S10:** 1D chain cross-section for **1** (left) and **2** (right).

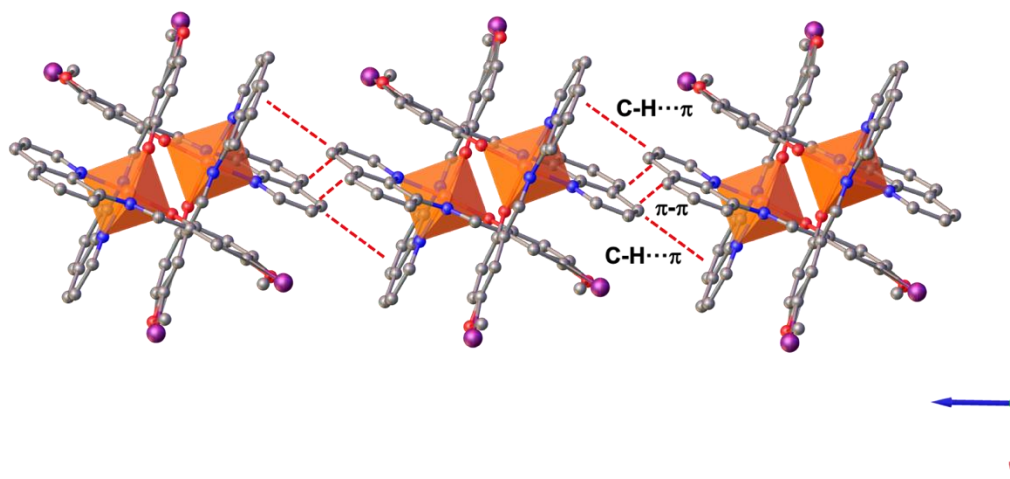

**Figure S11:** Structural representation of the P4AE interaction in the supramolecular 2D plane of **1** at 150 K.

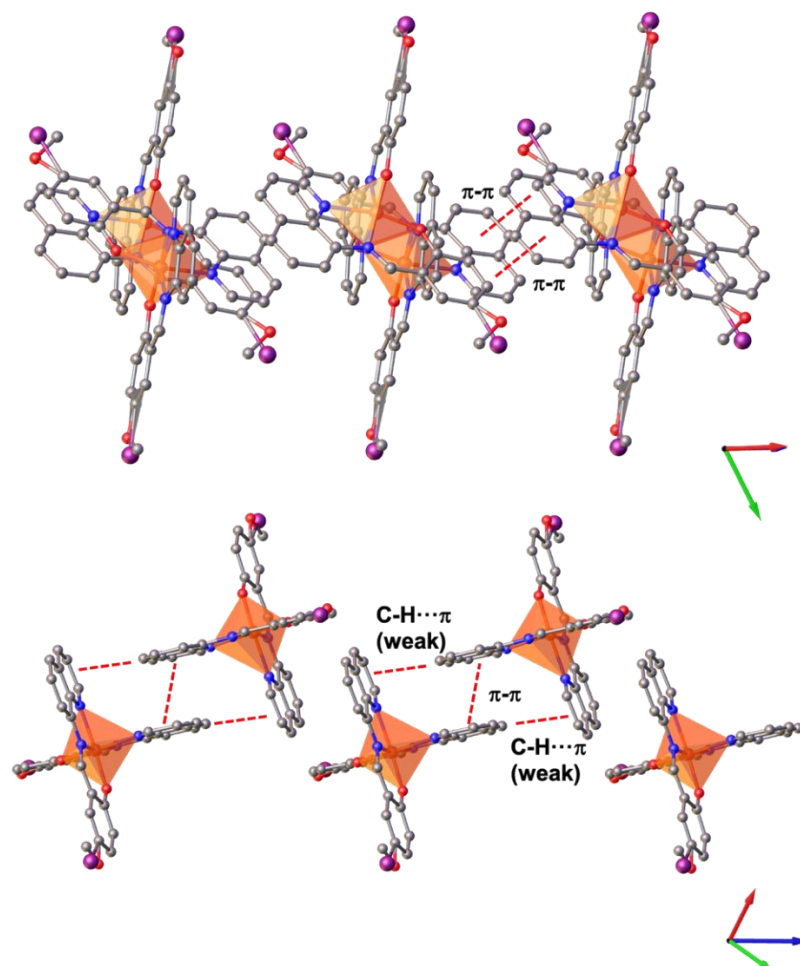

**Figure S12:** Structural representation from different views of the  $\pi$ - $\pi$  interactions in the supramolecular 2D plane of **2** at 150 K.

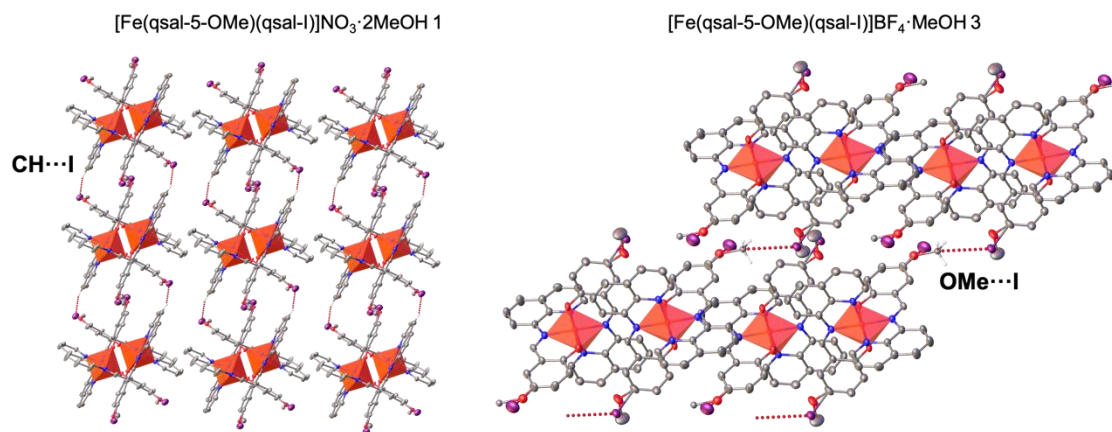

**Figure S13:** Structural representation of the 3D structure with the cations interacting by C-H...I interactions for **1** (left) and **2** (right).

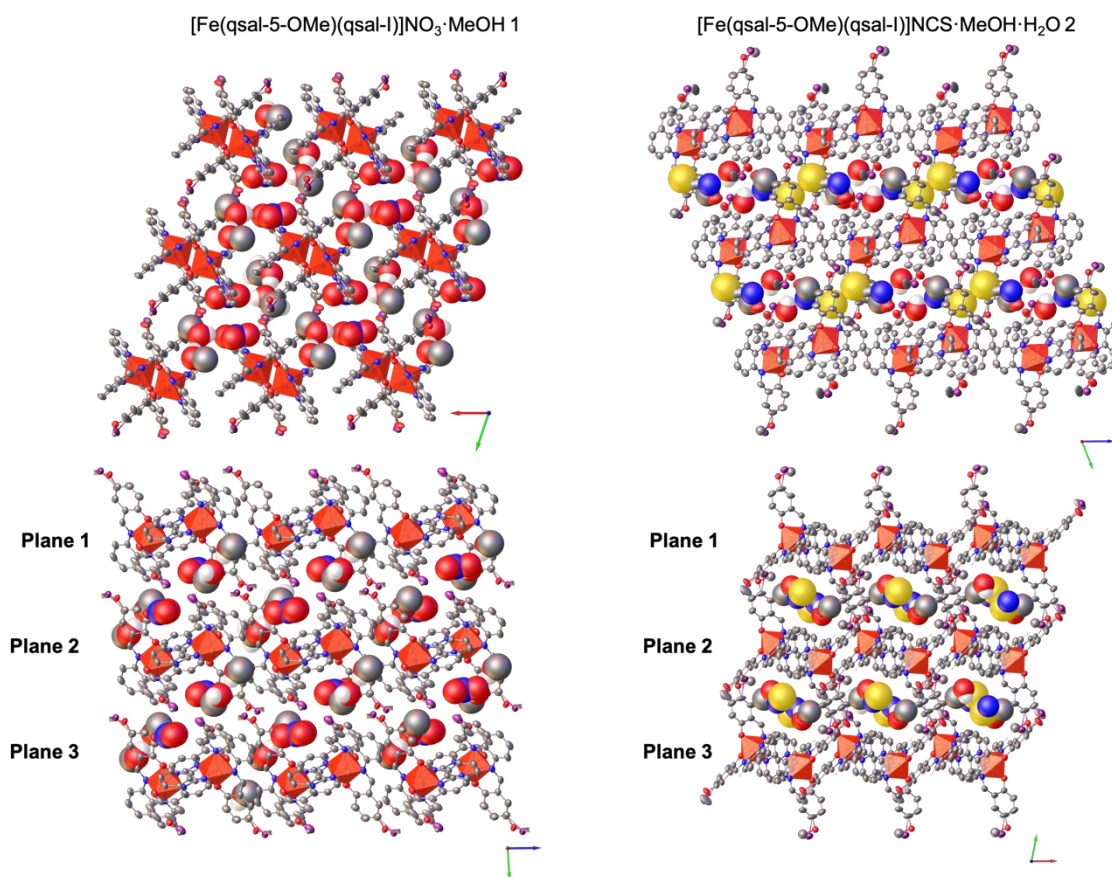

**Figure S14:** Structural representation of the 3D structure of **1** (left) and **2** (right) at 150 K.



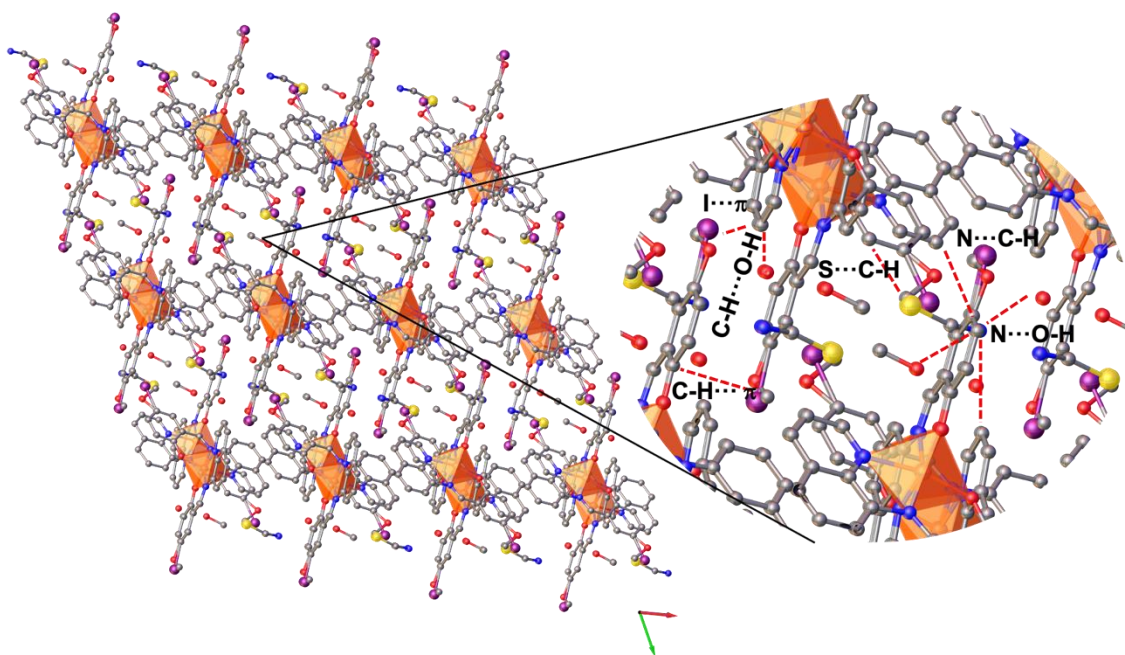

**Figure S15:** Structural representation of the 3D structure with the interactions of **2** at 150 K.



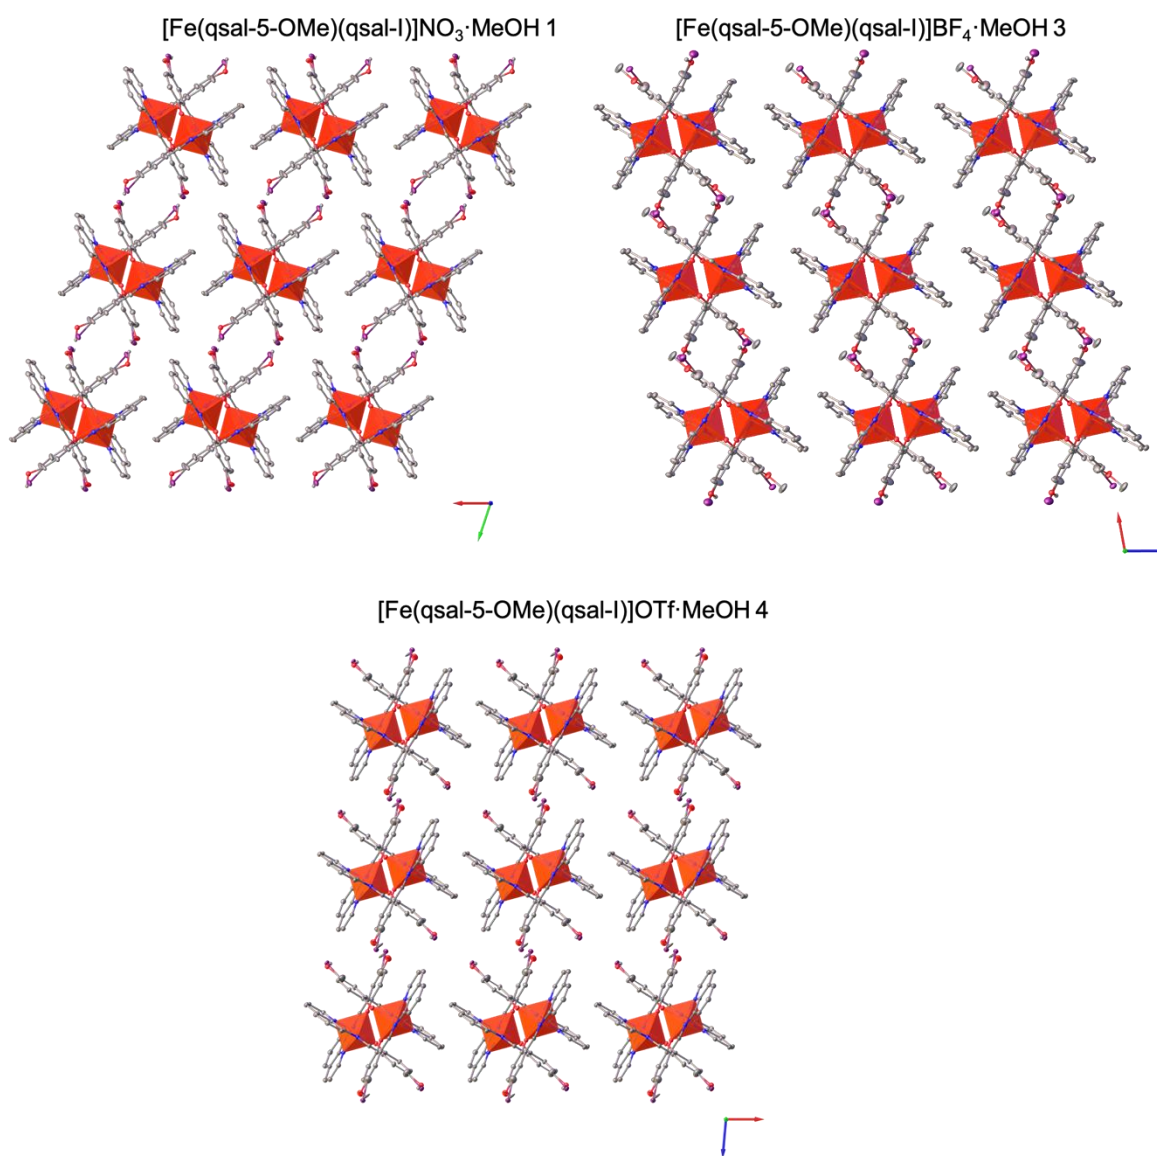

**Figure S16:** Structural representation of the 3D structure with the methoxy-iodine groups facing each other (**1** and **3**, top) and shifted (**4** bottom).

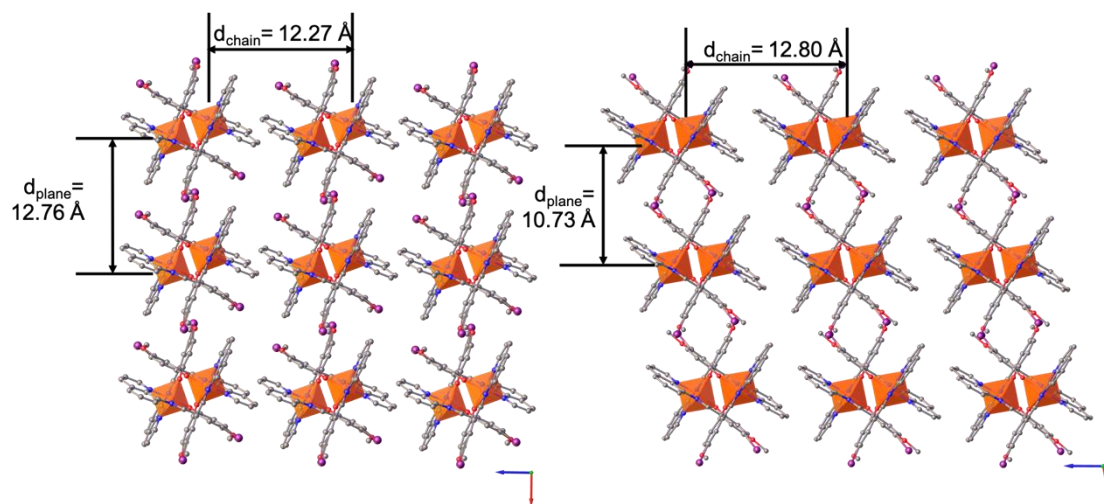

**Figure S17:** View of  $d_{\text{chain}}$  (horizontal) and  $d_{\text{plane}}$  (vertical) of **4** (left) and **3** (right) at 150 K.

**Table S5** Distances between the chains ( $d_{\text{chain}}$ ) and the planes ( $d_{\text{plane}}$ ) at different temperatures (LT = low temperature, RT = room temperature, HT = high temperature) for **1-4**.

|                                                            | T = 150 K          |                    | T = 300 K (280 K for <b>5</b> ) |                    |
|------------------------------------------------------------|--------------------|--------------------|---------------------------------|--------------------|
|                                                            | $d_{\text{chain}}$ | $d_{\text{plane}}$ | $d_{\text{chain}}$              | $d_{\text{plane}}$ |
| [Fe(qsal-5-OMe)(qsal-I)]NO <sub>3</sub> ·2MeOH <b>1</b>    | 12.012             | 12.255             | 11.997                          | 12.417             |
| [Fe(qsal-5-OMe)(qsal-I)]NCS·MeOH·H <sub>2</sub> O <b>2</b> | 12.617             | 10.779             |                                 |                    |
| [Fe(qsal-5-OMe)(qsal-I)]BF <sub>4</sub> ·MeOH <b>3</b>     | 12.800             | 10.737             | 12.826                          | 10.832             |
| [Fe(qsal-5-OMe)(qsal-I)]OTf·MeOH <b>4</b>                  | 12.277             | 12.765             | 11.933                          | 13.144             |

**Table S6** Angle between the 1D chains ( $\theta^\circ$ ) and N-Fe-N angles ( $\theta^\circ$ ) for **1-4**.

|                                                            | Temperature | Angle between 1D chains ( $\theta^\circ$ ) | N-Fe-N ( $\theta^\circ$ ) |
|------------------------------------------------------------|-------------|--------------------------------------------|---------------------------|
| [Fe(qsal-5-OMe)(qsal-I)]NO <sub>3</sub> ·2MeOH <b>1</b>    | 150 K       | 0.0                                        | 173                       |
|                                                            | 300 K       | 0.0                                        | 169                       |
| [Fe(qsal-5-OMe)(qsal-I)]NCS·MeOH·H <sub>2</sub> O <b>2</b> | 150 K       | 0.0                                        | 164                       |
| [Fe(qsal-5-OMe)(qsal-I)]BF <sub>4</sub> ·MeOH <b>3</b>     | 150 K       | 0.0                                        | 176                       |
|                                                            | 300 K       | 0.0                                        | 171                       |
| [Fe(qsal-5-OMe)(qsal-I)]OTf·MeOH <b>4</b>                  | 150 K       | 0.1                                        | 176                       |
|                                                            | 280 K       | 0.0                                        | 167                       |

**Comparison of the [Fe(qsal-I)(qsal-5-OMe)]OTf with the homoleptic complexes**

**Table S7** Selected Fe-N/O bond length (Å), volume cell (Å<sup>3</sup>) and octahedral distortion parameters at various temperatures for **4-6**.

|                             | [Fe(qsal-5-OMe)(qsal-I)]OTf·MeOH <b>4</b> |              | [Fe(qsal-I) <sub>2</sub> ]OTf·MeOH <b>5</b> |              | [Fe(qsal-5-OMe) <sub>2</sub> ]OTf·DCM <b>6</b> |              |
|-----------------------------|-------------------------------------------|--------------|---------------------------------------------|--------------|------------------------------------------------|--------------|
|                             | <b>150 K</b>                              | <b>280 K</b> | <b>163 K</b>                                | <b>293 K</b> | <b>150 K</b>                                   | <b>280 K</b> |
| <b>Fe1-O1ph</b>             | 1.880(4)                                  | 1.900(4)     | 1.874(9)                                    | 1.906(7)     | 1.884(2)                                       | 1.882(2)     |
| <b>Fe1-O2ph</b>             | 1.877(3)                                  | 1.908(3)     | 1.878(7)                                    | 1.908(6)     | 1.873(2)                                       | 1.873(2)     |
| <b>Fe1-Oph<sub>av</sub></b> | 1.879                                     | 1.904        | 1.876                                       | 1.907        | 1.878                                          | 1.877        |
| <b>Fe1-N1quin</b>           | 1.980(5)                                  | 2.130(4)     | 1.97(1)                                     | 2.10(1)      | 1.973(2)                                       | 1.979(2)     |
| <b>Fe1-N2im</b>             | 1.949(6)                                  | 2.086(5)     | 1.94(1)                                     | 2.145(7)     | 1.943(2)                                       | 1.937(3)     |
| <b>Fe1-N3quin</b>           | 1.977(3)                                  | 2.122(4)     | 2.010(9)                                    | 2.157(3)     | 1.976(2)                                       | 1.987(2)     |
| <b>Fe1-N4im</b>             | 1.945(7)                                  | 2.093(5)     | 1.95(1)                                     | 2.10(1)      | 1.937(3)                                       | 1.939(3)     |
| <b>Fe1-N<sub>av</sub></b>   | 1.962                                     | 2.107        | 1.967                                       | 2.125        | 1.957                                          | 1.960        |
| <b>V / Å<sup>3</sup></b>    | 1679                                      | 1739         | 1698                                        | 1719         | 1682                                           | 1716         |
| <b>Σ-Fe1, Fe2</b>           | 46                                        | 58           | 44                                          | 62           | 46                                             | 45           |
| <b>Θ-Fe1, Fe2</b>           | 118                                       | 213          | 114                                         | 237          | 118                                            | 117          |
| <b>Spin state</b>           | LS                                        | HS           | LS                                          | HS           | LS                                             | LS           |

**Table S8** Crystallographic data and structure refinement parameters for **4-6**.

|                                                 | [Fe(qsal-5-OMe)(qsal-I)]OTf·MeOH <b>4</b>                                         |                                                                                   | [Fe(qsal-I) <sub>2</sub> ]OTf·MeOH <b>5</b>                                                     |                                                                                                 | [Fe(qsal-5-OMe) <sub>2</sub> ]OTf·DCM <b>6</b>                                                   |                                                                                                  |
|-------------------------------------------------|-----------------------------------------------------------------------------------|-----------------------------------------------------------------------------------|-------------------------------------------------------------------------------------------------|-------------------------------------------------------------------------------------------------|--------------------------------------------------------------------------------------------------|--------------------------------------------------------------------------------------------------|
|                                                 | <b>150 K</b>                                                                      | <b>280 K</b>                                                                      | <b>163 K</b>                                                                                    | <b>293 K</b>                                                                                    | <b>150 K</b>                                                                                     | <b>280 K</b>                                                                                     |
| <b>Empirical formula</b>                        | C <sub>35</sub> H <sub>27</sub> F <sub>3</sub> FeIN <sub>4</sub> O <sub>7</sub> S | C <sub>35</sub> H <sub>27</sub> F <sub>3</sub> FeIN <sub>4</sub> O <sub>7</sub> S | C <sub>34</sub> H <sub>24</sub> F <sub>3</sub> FeI <sub>2</sub> N <sub>4</sub> O <sub>6</sub> S | C <sub>34</sub> H <sub>24</sub> F <sub>3</sub> FeI <sub>2</sub> N <sub>4</sub> O <sub>6</sub> S | C <sub>36</sub> H <sub>28</sub> Cl <sub>2</sub> F <sub>3</sub> FeN <sub>4</sub> O <sub>7</sub> S | C <sub>36</sub> H <sub>28</sub> Cl <sub>2</sub> F <sub>3</sub> FeN <sub>4</sub> O <sub>7</sub> S |
| <b>Formula weight/ gmol<sup>-1</sup></b>        | 887.41                                                                            | 887.41                                                                            | 982.79                                                                                          | 982.79                                                                                          | 844.43                                                                                           | 844.43                                                                                           |
| <b>Crystal system</b>                           | triclinic                                                                         | triclinic                                                                         | triclinic                                                                                       | triclinic                                                                                       | triclinic                                                                                        | triclinic                                                                                        |
| <b>Space group</b>                              | P $\bar{1}$                                                                       | P $\bar{1}$                                                                       | P $\bar{1}$                                                                                     | P $\bar{1}$                                                                                     | P $\bar{1}$                                                                                      | P $\bar{1}$                                                                                      |
| <b>a / Å</b>                                    | 12.2770(4)                                                                        | 11.9334(2)                                                                        | 12.2488(5)                                                                                      | 11.7726(4)                                                                                      | 12.3329(3)                                                                                       | 12.3692(5)                                                                                       |
| <b>b / Å</b>                                    | 12.4031(5)                                                                        | 12.6849(2)                                                                        | 12.3956(4)                                                                                      | 12.6918(4)                                                                                      | 12.3551(2)                                                                                       | 12.4482(4)                                                                                       |
| <b>c / Å</b>                                    | 12.7647(6)                                                                        | 13.1443(4)                                                                        | 12.8192(9)                                                                                      | 13.3179(9)                                                                                      | 12.8195(3)                                                                                       | 12.9361(5)                                                                                       |
| <b>α / °</b>                                    | 68.856(4)                                                                         | 71.125(2)                                                                         | 70.108(5)                                                                                       | 69.437(5)                                                                                       | 79.960(2)                                                                                        | 74.641(3)                                                                                        |
| <b>β / °</b>                                    | 86.751(3)                                                                         | 86.434(2)                                                                         | 87.581(6)                                                                                       | 85.020(6)                                                                                       | 74.257(2)                                                                                        | 80.008(3)                                                                                        |
| <b>γ / °</b>                                    | 68.419(4)                                                                         | 67.786(2)                                                                         | 68.745(5)                                                                                       | 67.526(5)                                                                                       | 63.718(2)                                                                                        | 63.540(4)                                                                                        |
| <b>Cell volume / Å<sup>3</sup></b>              | 1679.29(13)                                                                       | 1738.87(7)                                                                        | 1698.40(15)                                                                                     | 1719.03(14)                                                                                     | 1682.41(7)                                                                                       | 1715.93(13)                                                                                      |
| <b>Z</b>                                        | 2                                                                                 | 2                                                                                 | 2                                                                                               | 2                                                                                               | 2                                                                                                | 2                                                                                                |
| <b>Absorption coefficient / mm<sup>-1</sup></b> | 12.047                                                                            | 11.634                                                                            | 19.012                                                                                          | 18.784                                                                                          | 6.303                                                                                            | 6.180                                                                                            |
| <b>Reflections collected</b>                    | 25194                                                                             | 27210                                                                             | 19123                                                                                           | 21734                                                                                           | 26061                                                                                            | 27182                                                                                            |
| <b>Independent reflections, R<sub>int</sub></b> | 6140, 0.0848                                                                      | 6347                                                                              | 6290, 0.0875                                                                                    | 4843/0.0681                                                                                     | 6166/0.0523                                                                                      | 6272/0.0437                                                                                      |
| <b>Max. and min. transmission</b>               | 0.508/0.038                                                                       | 0.358/0.044                                                                       | 1.0/0.57                                                                                        | 1.0/0.34                                                                                        | 0.852/0.502                                                                                      | 0.831/0.370                                                                                      |
| <b>Restraints/parameters</b>                    | 3/490                                                                             | 0/481                                                                             | 6/462                                                                                           | 12/462                                                                                          | 0/489                                                                                            | 0/489                                                                                            |
| <b>Final R indices [I ≥ 2σ (I)]</b>             | 0.0690                                                                            | 0.0698                                                                            | 0.0969                                                                                          | 0.0715                                                                                          | 0.0493                                                                                           | 0.0539                                                                                           |
| <b>R<sub>1</sub>, wR<sub>2</sub></b>            | 0.1675                                                                            | 0.1971                                                                            | 0.3147                                                                                          | 0.2346                                                                                          | 0.1321                                                                                           | 0.1507                                                                                           |
| <b>CCDC No.</b>                                 | 2281922                                                                           | 2281923                                                                           | 929013                                                                                          | 929014                                                                                          | 2281924                                                                                          | 2281925                                                                                          |

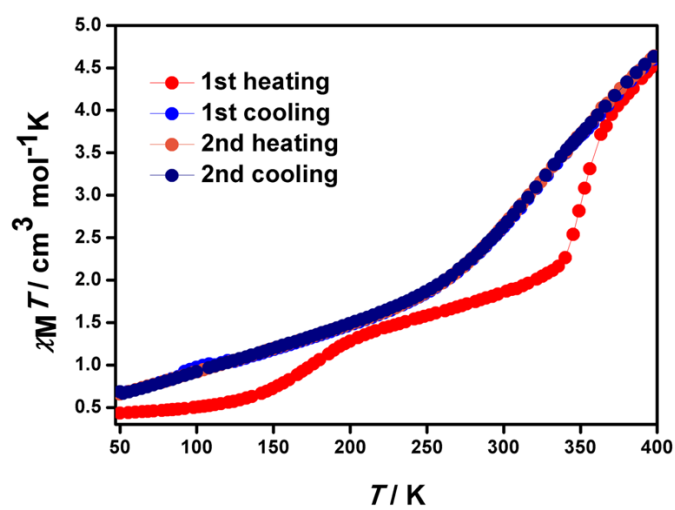

**Figure S18:**  $\chi_M T$  vs.  $T$  plot of **6**.

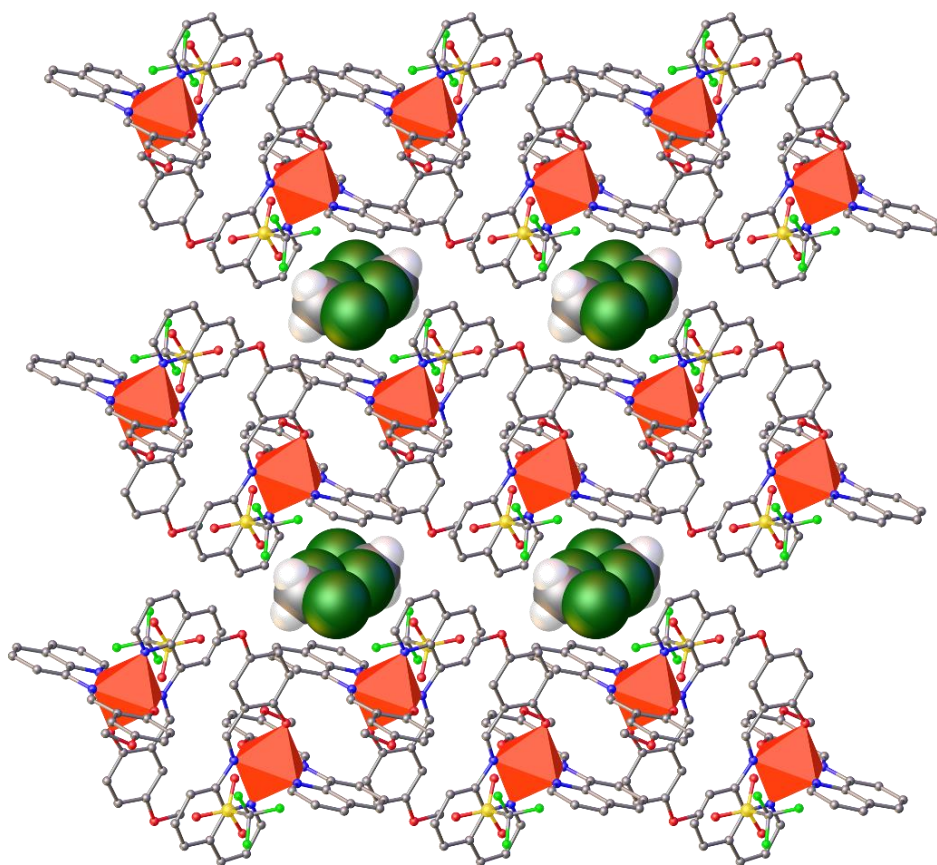

**Figure S19:** Structural representation of the channel in the 3D structure where the DCM solvent is located for **6**.

**Table S9** Intermolecular interactions for **4-6** (Å).

|                            |                                       | [Fe(qsal-5-OMe)(qsal-I)]OTf·MeOH <b>4</b> |              | [Fe(qsal-I) <sub>2</sub> ]OTf·MeOH <b>5</b> |              | [Fe(qsal-5-OMe) <sub>2</sub> ]OTf·DCM <b>6</b> |              |
|----------------------------|---------------------------------------|-------------------------------------------|--------------|---------------------------------------------|--------------|------------------------------------------------|--------------|
|                            |                                       | <b>150 K</b>                              | <b>280 K</b> | <b>163 K</b>                                | <b>293 K</b> | <b>150 K</b>                                   | <b>280 K</b> |
| <b><u>1D chains</u></b>    |                                       |                                           |              |                                             |              |                                                |              |
| <b>Fe-Fe</b>               |                                       |                                           |              |                                             |              |                                                |              |
|                            | $\pi$ - $\pi$ (C10-C10)               | 3.260                                     | 3.397        | 3.332                                       | 3.461        | 3.282                                          | 3.363        |
|                            | $\pi$ - $\pi$ (C28-C24)               | 3.395                                     | 3.355        | 3.385                                       | 3.482        | 3.462                                          | 3.481        |
|                            | C-H $\cdots$ O (H10-O2)               | 2.534                                     | 2.531        | 2.506                                       | 2.601        | 2.638                                          | 2.656        |
|                            | Fe-Fe (Type A)                        | 6.796                                     | 6.754        | 6.756                                       | 6.643        | 6.880                                          | 6.911        |
|                            | Fe-Fe (Type B)                        | 6.980                                     | 6.895        | 6.997                                       | 6.799        | 6.957                                          | 6.963        |
| <b><u>2D plane</u></b>     |                                       |                                           |              |                                             |              |                                                |              |
|                            | $\pi$ - $\pi$ (P4AE) (C1-C2)          | 3.404                                     | 3.450        | 3.455                                       | 3.529        | -                                              | -            |
|                            | C-H $\cdots$ $\pi$ (P4AE) (H3-cg)     | 2.509                                     | 2.559        | 2.467                                       | 2.569        | -                                              | -            |
|                            | C-H $\cdots$ O                        | -                                         | -            | -                                           | -            | -                                              | -            |
|                            | O $\cdots$ I                          | -                                         | -            | -                                           | -            | -                                              | -            |
| <b><u>3D structure</u></b> |                                       |                                           |              |                                             |              |                                                |              |
|                            | C <sub>arom</sub> $\cdots$ I (C12-I2) | -                                         | -            | -                                           | -            | -                                              | -            |
|                            | C-H $\cdots$ $\pi$                    | -                                         | -            | -                                           | -            | 2.895                                          | 2.871        |
| <b>Anion</b>               |                                       |                                           |              |                                             |              |                                                |              |
|                            | O $\cdots$ CH                         | 2.559                                     | 2.642        | 2.545                                       | 2.474        | 2.494                                          | 2.529        |
|                            | S $\cdots$ CH                         | 2.507                                     | 2.602        | 2.485                                       | 2.629        | -                                              | -            |
| <b>Solvent</b>             |                                       | 2.639                                     | 2.678        | 2.612                                       | 2.586        | 2.284                                          | 2.257        |



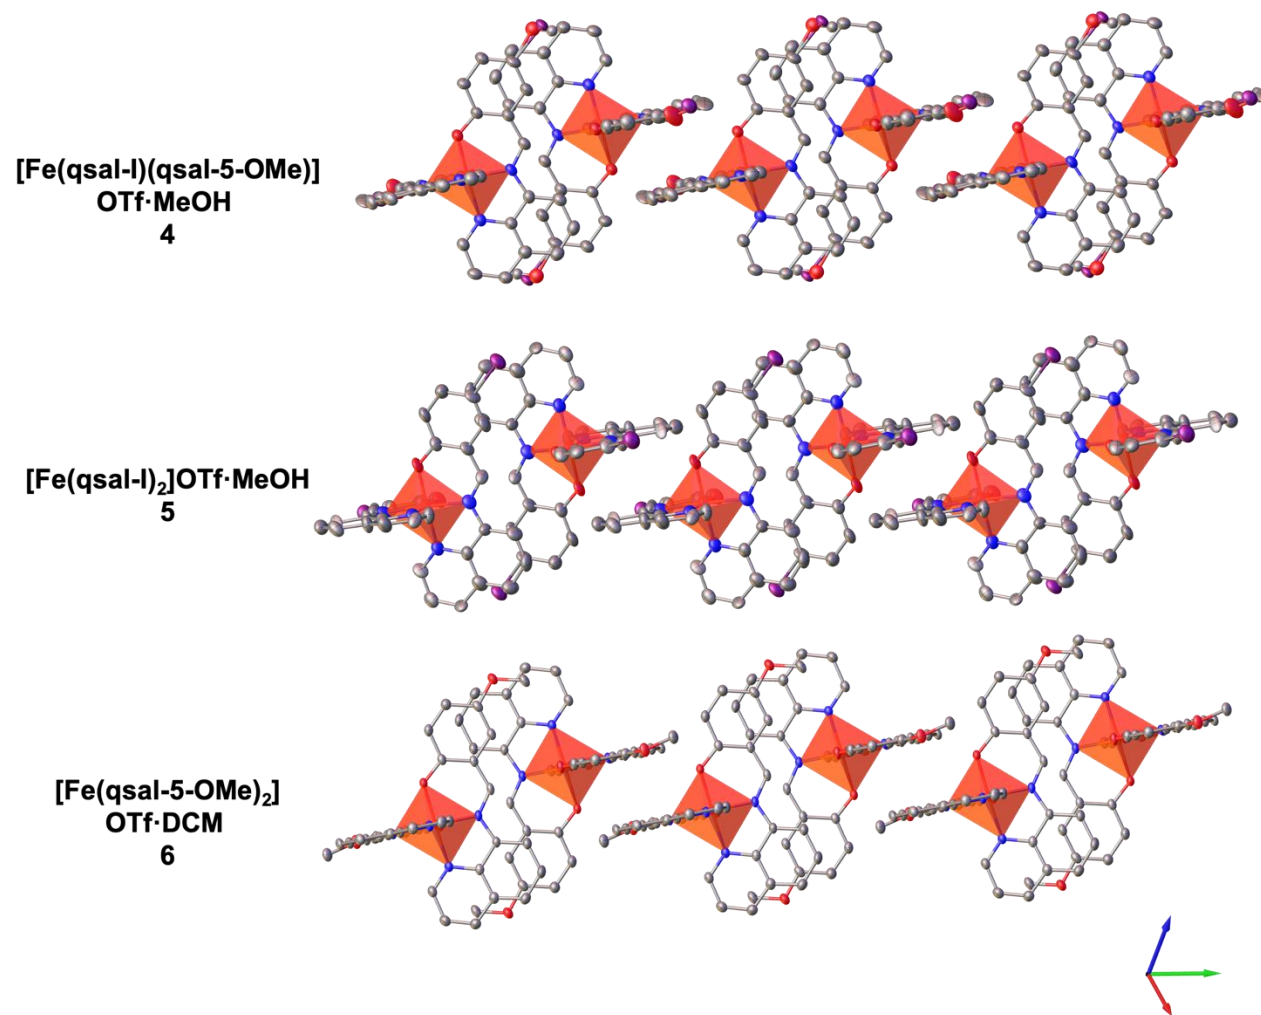

**Figure S20:** Structural representation of the supramolecular 1D chain for 4-6 at 150 K.

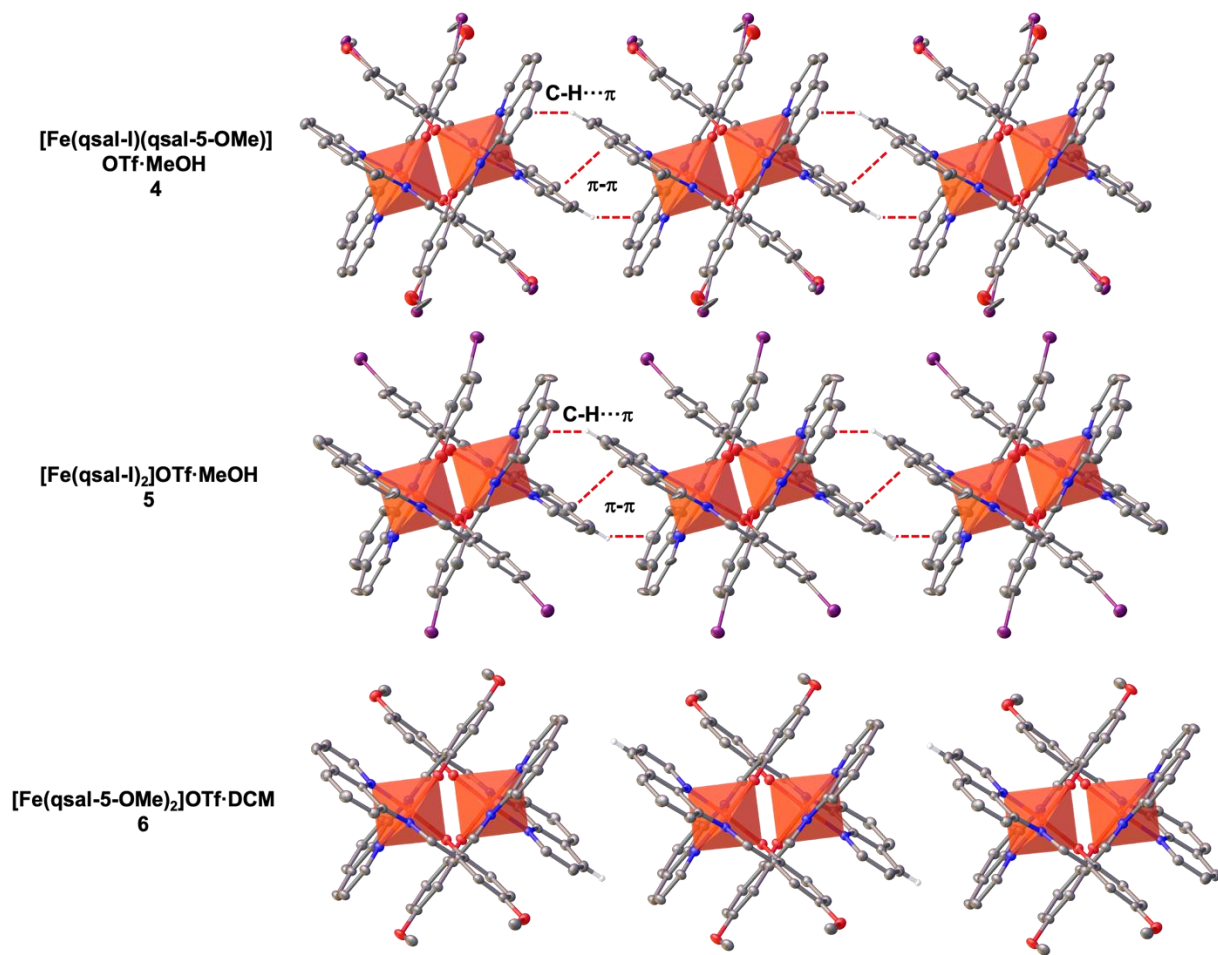

**Figure S21:** Structural representation of the supramolecular 2D plane for **4-6** at 150 K.

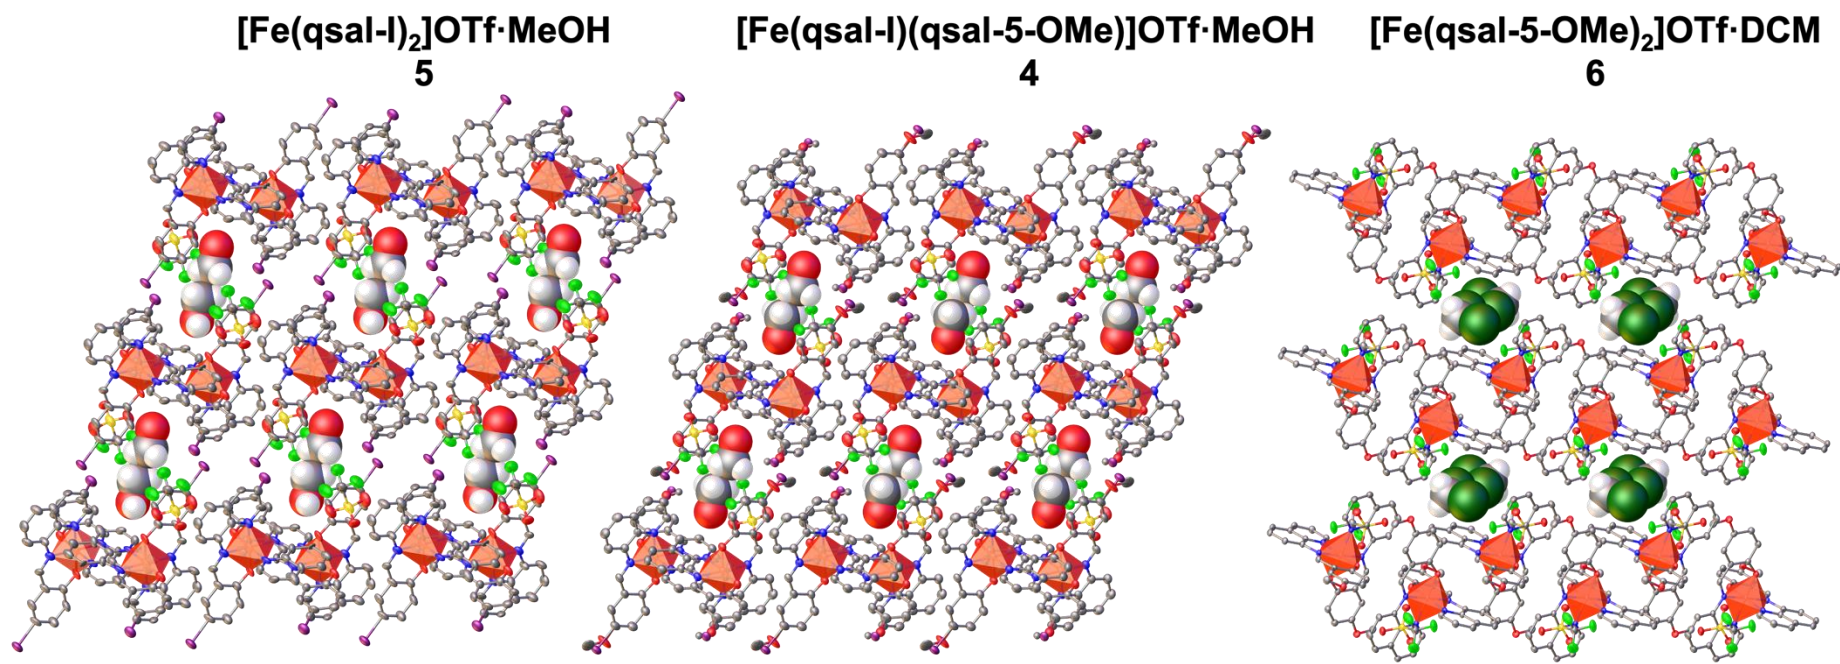

**Figure S22:** Structural representation of the 3D structure for 4-6 at 150 K.

**Table S10:** Distances between the chains ( $d_{\text{chain}}$ ) and the planes ( $d_{\text{plane}}$ ) at different temperatures (LT = low temperature, RT = room temperature, HT = high temperature) for **4-6**.

|                                                | T = 150 K          |                    | T = RT             |                    |
|------------------------------------------------|--------------------|--------------------|--------------------|--------------------|
|                                                | $d_{\text{chain}}$ | $d_{\text{plane}}$ | $d_{\text{chain}}$ | $d_{\text{plane}}$ |
| [Fe(qsal-5-OMe)(qsal-l)]OTf·MeOH <b>4</b>      | 12.277             | 12.765             | 11.933             | 13.144             |
| [Fe(qsal-l) <sub>2</sub> ]OTf·MeOH <b>5</b>    | 12.249             | 12.819             | 11.773             | 13.318             |
| [Fe(qsal-5-OMe) <sub>2</sub> ]OTf·DCM <b>6</b> | 12.819             | 12.333             | 12.936             | 12.448             |

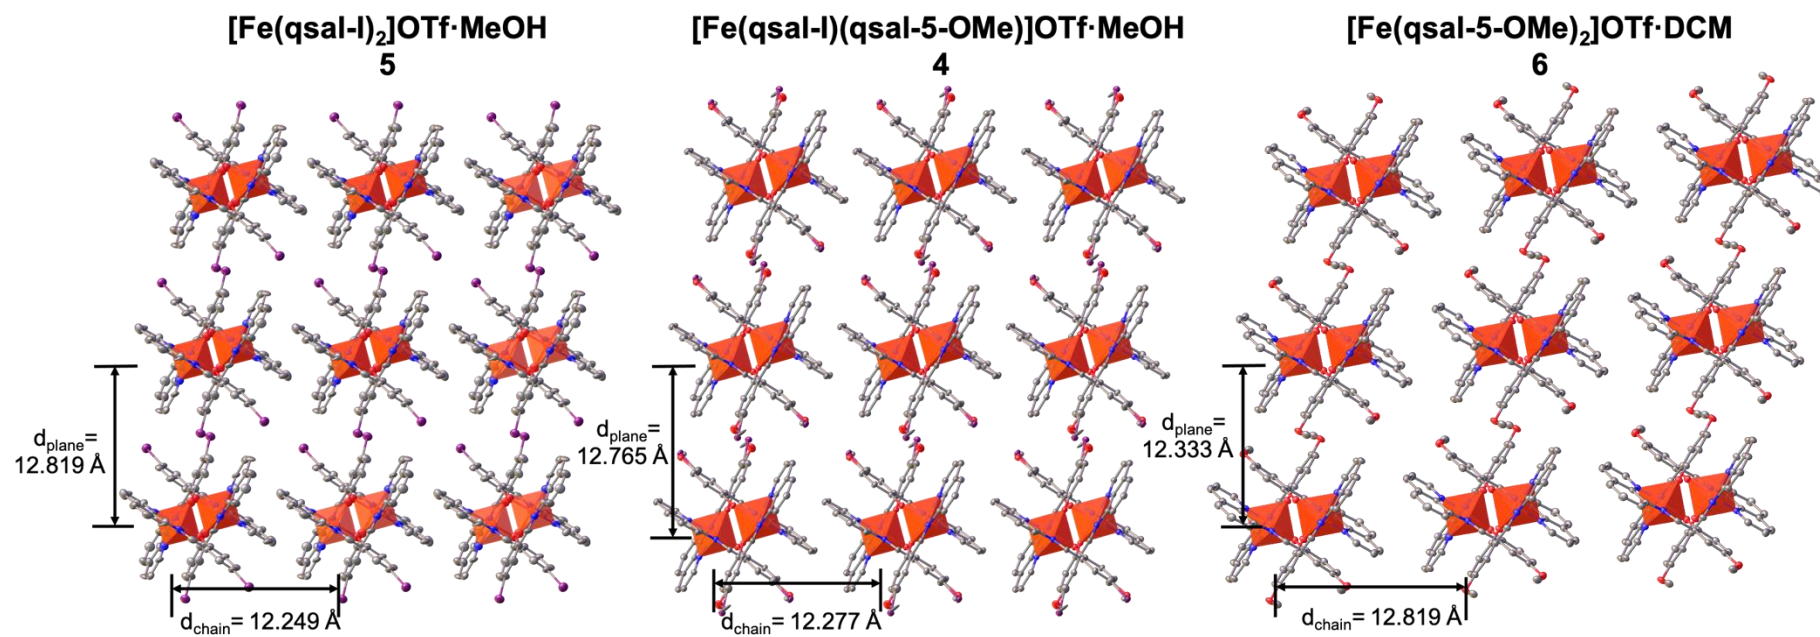

**Figure S23:** View of  $d_{\text{chain}}$  (horizontal) and  $d_{\text{plane}}$  (vertical) for 4-6 at 150 K.

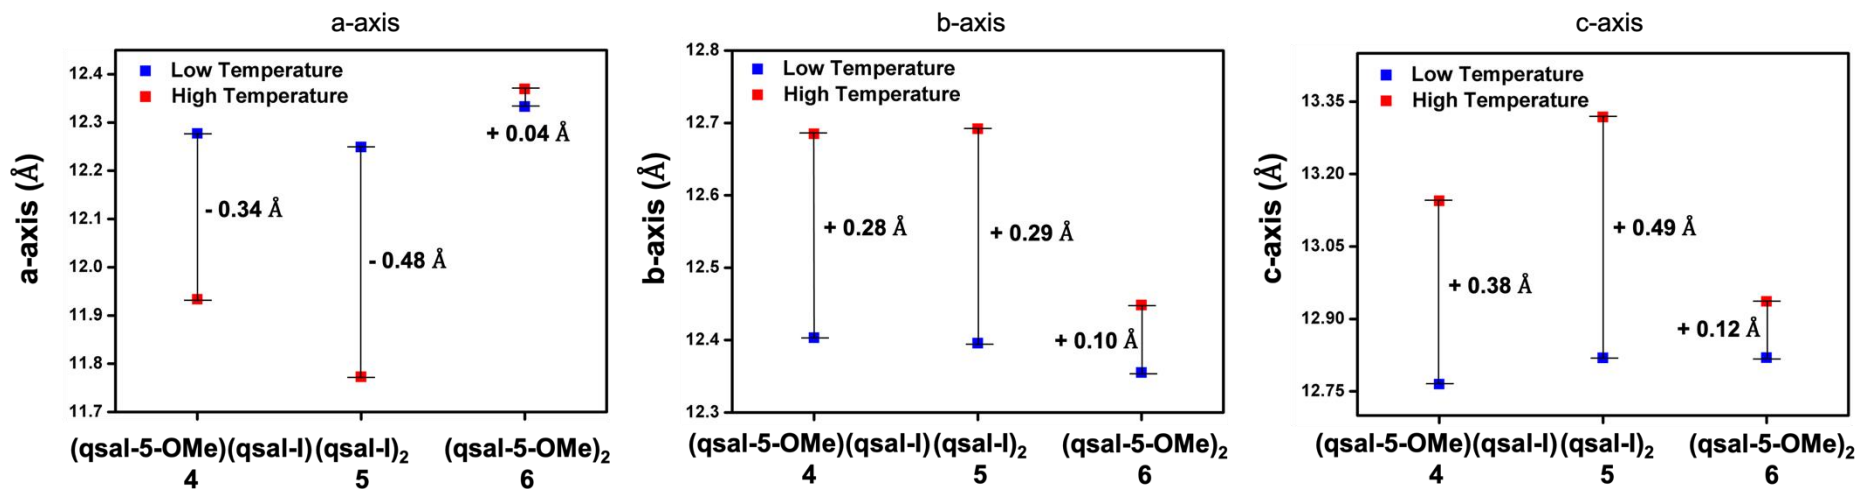

**Figure S24:** Plot of the variation of the cell parameter *a*-axis, *b*-axis and *c*-axis at low (blue) and high (red) temperature for 4-6.

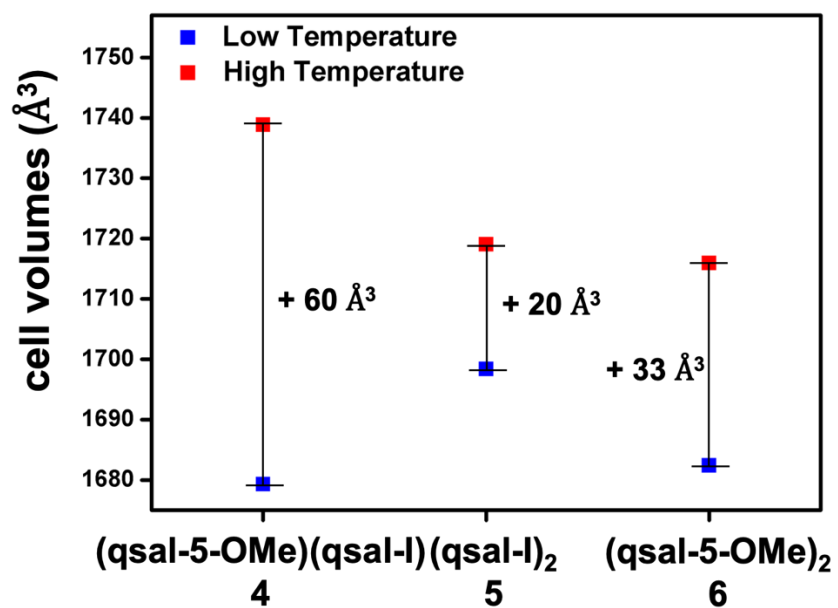

**Figure S25:** Plot of the variation of the cell volumes at low (blue) and high (red) temperature for 4-6.







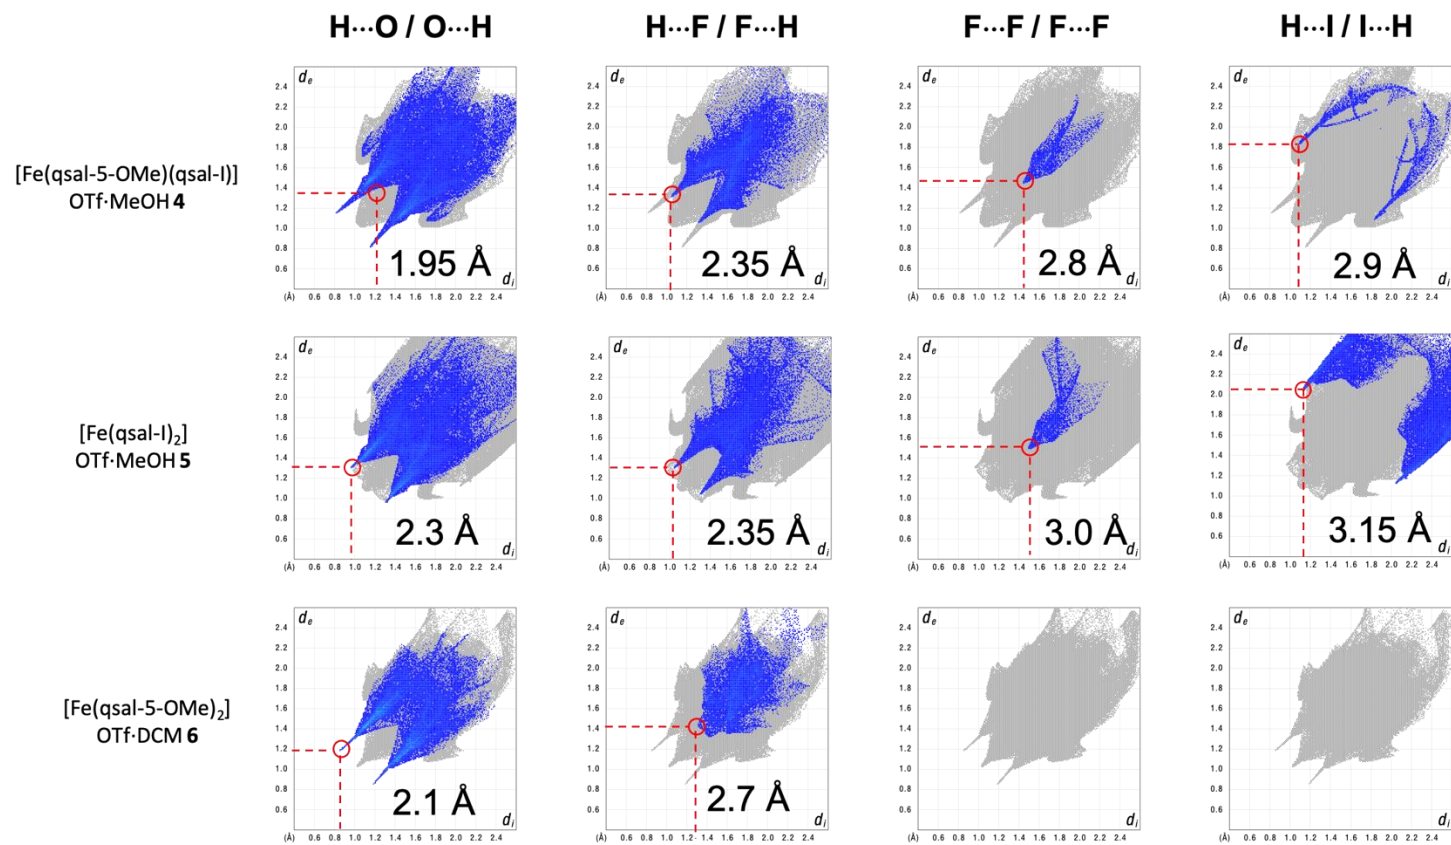

Figure S27: Hirshfeld surface 2D fingerprint plots for **4-6** at 150 K.

**Table S11:** Intermolecular interactions contributions for **1-6** calculated by Hirshfeld surface at different temperatures.

|                                                            |       | H...H | H...C | H...O | H...N | H...I | H...X | H...S | C...C | C...O | C...I | O...F | O...I | I...I | F...F | Other |
|------------------------------------------------------------|-------|-------|-------|-------|-------|-------|-------|-------|-------|-------|-------|-------|-------|-------|-------|-------|
| [Fe(qsal-5-OMe)(qsal-I)]NO <sub>3</sub> ·2MeOH <b>1</b>    | 150 K |       |       |       |       |       |       |       |       |       |       |       |       |       |       |       |
|                                                            | 300 K | 31.0  | 17.1  | 20.6  | 2.6   | 15.2  | -     | -     | 7.3   | -     | 2.9   |       | 2.3   | 0.6   | -     | 0.4   |
| [Fe(qsal-5-OMe)(qsal-I)]NCS·MeOH·H <sub>2</sub> O <b>2</b> | 150 K | 38.4  | 22.5  | 12.3  | 8.5   | 2.6   | -     | 4.6   | 8.1   | 1.2   | 0.3   |       | 0.3   | 0.0   | -     | 1.2   |
|                                                            | 150 K | 38.6  | 21.5  | 8.7   | 1.0   | 1.3   | 19.1  | -     | 6.3   | 1.9   | 1.3   |       | 0.0   | 0.0   | 0.0   | 0.3   |
| [Fe(qsal-5-OMe)(qsal-I)]BF <sub>4</sub> ·MeOH <b>3</b>     | 300 K | 38.0  | 20.1  | 9.4   | 1.4   | 1.6   | 19.3  | -     | 6.7   | 1.8   | 1.4   |       | 0.0   | 0.0   | 0.0   | 0.3   |
|                                                            | 150 K | 34.8  | 19.6  | 21.4  | 1.5   | 1.5   | 11.1  | 0.0   | 6.4   | 1.5   | 0.9   | 0.0   | 0.0   | 0.0   | 1.2   | 0.1   |
| [Fe(qsal-5-OMe)(qsal-I)]OTf·MeOH <b>4</b>                  | 280 K | 35.0  | 17.8  | 21.0  | 2.0   | 1.3   | 11.4  | 0.0   | 7.4   | 2.1   | 0.3   |       | 0.1   | 0.1   | 1.1   | 0.4   |
|                                                            | 163 K | 23.3  | 14.9  | 19.3  | 1.3   | 10.3  | 10.1  | 0.0   | 6.5   | 1.2   | 5.8   | 1.4   | 0.5   | 0.8   | 1.4   | 4.6   |
| [Fe(qsal-I) <sub>2</sub> ]OTf·MeOH <b>5</b>                | 293 K | 24.1  | 13.3  | 22.2  | 1.9   | 10.5  | 8.4   | 0.0   | 7.3   | 1.1   | 4.7   |       | 0.7   | 0.7   | 1.3   | 3.8   |
|                                                            | 150 K | 31.3  | 15.5  | 19.4  | 1.0   | -     | 10.3  | 0.0   | 5.4   | 1.6   | -     | 0.9   | -     | -     | 0.0   | 15.5  |
| [Fe(qsal-5-OMe) <sub>2</sub> ]OTf·DCM <b>6</b>             | 280 K | 31.6  | 15.4  | 19.7  | 1.0   | -     | 10.5  | 0.0   | 5.2   | 1.5   | -     |       | -     | -     | 0.0   | 15.1  |

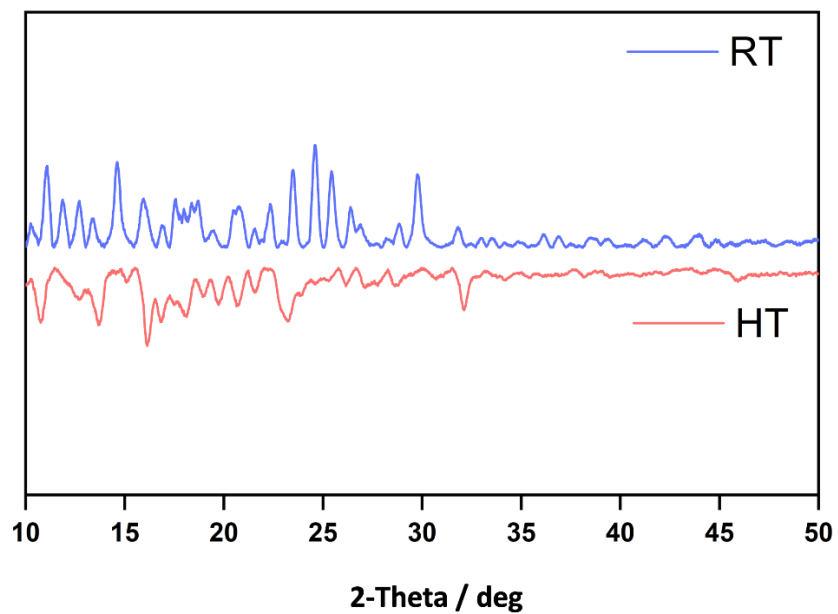

**Figure S28:** Experimental PXRD diffractograms for **4** at room temperature (blue) and after heating at 400 K (red).

**Table S12:** Summary of SCO features of the homoleptic and heteroleptic complexes within the family

| Compound                                                   | SCO             | T <sub>1/2</sub>                                       | Hysteresis | Ref           |
|------------------------------------------------------------|-----------------|--------------------------------------------------------|------------|---------------|
| NO <sub>3</sub> anion                                      |                 |                                                        |            |               |
| [Fe(qsal-5-OMe)(qsal-I)]NO <sub>3</sub> ·2MeOH <b>1</b>    | Gradual         | 260 K                                                  | -          | This work     |
| [Fe(qsal-I) <sub>2</sub> ]NO <sub>3</sub> ·MeOH            | Abrupt          | 210 K                                                  | -          | <sup>9</sup>  |
| [Fe(qsal-5-OMe) <sub>2</sub> ]NO <sub>3</sub>              | unknown         |                                                        |            | -             |
| NCS anion                                                  |                 |                                                        |            |               |
| [Fe(qsal-5-OMe)(qsal-I)]NCS·MeOH·H <sub>2</sub> O <b>2</b> | HS              | -                                                      | -          | This work     |
| [Fe(qsal-I) <sub>2</sub> ]NCS·0.25DCM·0.5MeOH              | LS              | -                                                      | -          | <sup>10</sup> |
| [Fe(qsal-5-OMe) <sub>2</sub> ]NCS·DCM                      | HS              | 305 K                                                  |            | <sup>11</sup> |
| BF <sub>4</sub> anion                                      |                 |                                                        |            |               |
| [Fe(qsal-5-OMe)(qsal-I)]BF <sub>4</sub> ·MeOH <b>3</b>     | Gradual         | 280 K                                                  | -          | This work     |
| [Fe(qsal-I) <sub>2</sub> ]BF <sub>4</sub>                  | unknown         |                                                        |            | -             |
| [Fe(qsal-5-OMe) <sub>2</sub> ]BF <sub>4</sub> ·MeOH        | LS              | -                                                      |            | <sup>11</sup> |
| OTf anion                                                  |                 |                                                        |            |               |
| [Fe(qsal-5-OMe)(qsal-I)]OTf <b>4</b>                       | Abrupt          | T <sub>1/2</sub> ↑ = 260 K, T <sub>1/2</sub> ↓ = 225 K | 35 K       | This work     |
| [Fe(qsal-I) <sub>2</sub> ]OTf <b>5</b>                     | Abrupt          | T <sub>1/2</sub> ↑ = 232 K, T <sub>1/2</sub> ↓ = 224 K | 8 K        | <sup>12</sup> |
| [Fe(qsal-5-OMe) <sub>2</sub> ]OTf·DCM <b>6</b>             | Stepped-gradual | T <sub>1</sub> = 160 K, T <sub>2</sub> = 360 K         | -          | This work     |

**Table S13** Comparison of DFT optimized average metal-ligand bond lengths (Å) and volume cells (Å<sup>3</sup>) for the studied systems. The available experimental data is indicated in parenthesis.

|                                                |    | Fe-O <sub>av</sub> | Fe-N <sub>av</sub> | volume      |
|------------------------------------------------|----|--------------------|--------------------|-------------|
| [Fe(qsal-5-OMe)(qsal-I)]OTf·MeOH <b>4</b>      | HS | 1.950 (1.904)      | 2.164 (2.107)      | 1681 (1739) |
|                                                | LS | 1.910 (1.879)      | 1.958 (1.962)      | 1673 (1679) |
| [Fe(qsal-5-OMe)(qsal-I)]OTf                    | HS | 1.954              | 2.160              | 1643        |
|                                                | LS | 1.906              | 1.956              | 1610        |
| [Fe(qsal-I) <sub>2</sub> ]OTf·MeOH <b>5</b>    | HS | 1.948 (1.907)      | 2.159 (2.125)      | 1723 (1719) |
|                                                | LS | 1.907 (1.876)      | 1.958 (1.962)      | 1691 (1698) |
| [Fe(qsal-I) <sub>2</sub> ]OTf                  | HS | 1.955              | 2.159              | 1663        |
|                                                | LS | 1.910              | 1.954              | 1647        |
| [Fe(qsal-5-OMe) <sub>2</sub> ]OTf·DCM <b>6</b> | HS | 1.950              | 2.157              | 1728        |
|                                                | LS | 1.904 (1.877)      | 1.955 (1.957)      | 1691 (1682) |
| [Fe(qsal-5-OMe) <sub>2</sub> ]OTf              | HS | 1.954              | 2.154              | 1685        |
|                                                | LS | 1.907              | 1.954              | 1652        |

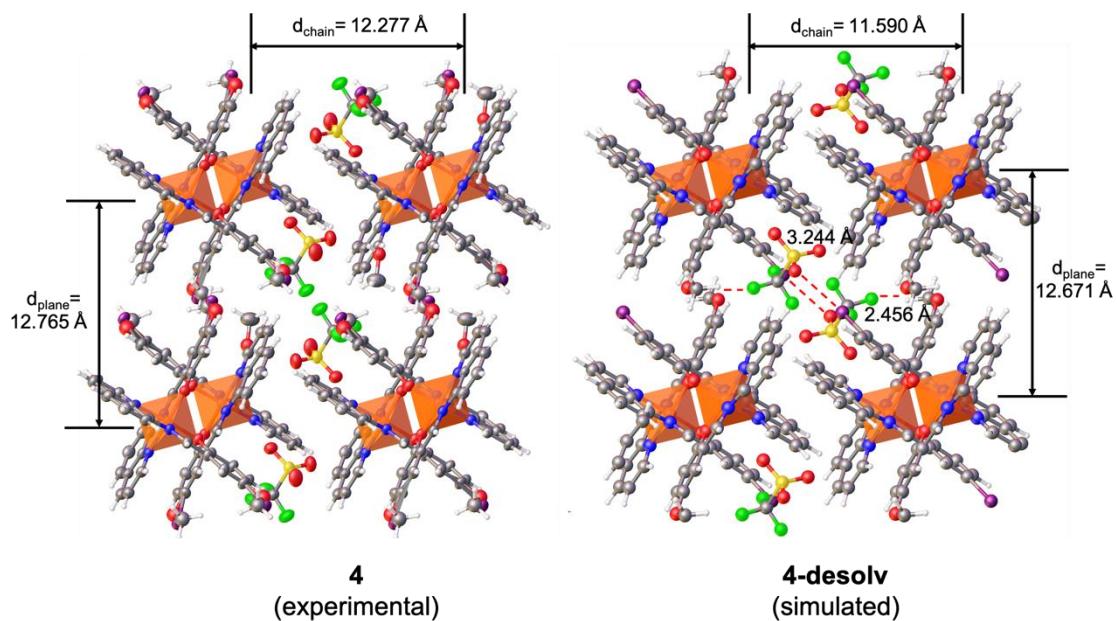

**Figure S29:** View of  $d_{\text{chain}}$  (horizontal) and  $d_{\text{plane}}$  (vertical) and interactions for **4** (experimental) and **4-desolv** (simulated) in the LS state.

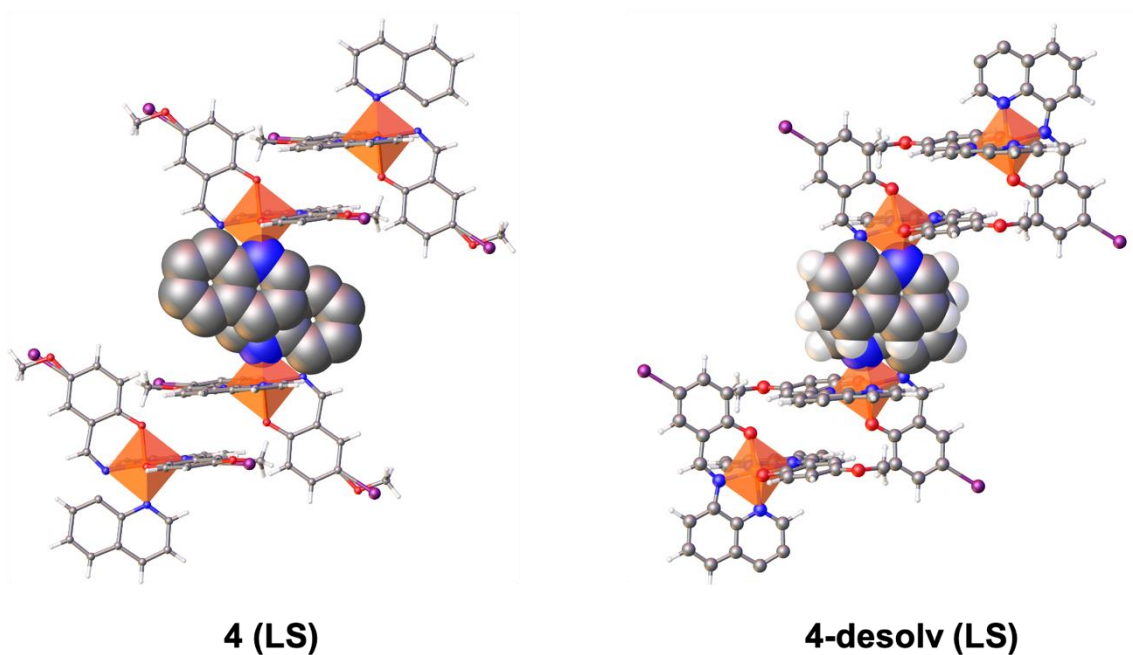

**Figure S30:** Comparison of  $\pi$ - $\pi$  interactions in **4** (LS state) (left) and **4-desolv** (LS state) (right).

**Table S14:** Distances between the chains ( $d_{\text{chain}}$ ) and the planes ( $d_{\text{plane}}$ ) at different spin state (LS = low spin, HS = high spin) for **4** (experimental), **4** (simulated) and **4-desolv** (simulated).

|                             | LS                 |                    | HS                 |                    |
|-----------------------------|--------------------|--------------------|--------------------|--------------------|
|                             | $d_{\text{chain}}$ | $d_{\text{plane}}$ | $d_{\text{chain}}$ | $d_{\text{plane}}$ |
| <b>4</b> (experimental)     | 12.277             | 12.765             | 11.933             | 13.144             |
| <b>4</b> (simulated)        | 12.299             | 12.795             | 12.149             | 13.146             |
| <b>4-desolv</b> (simulated) | 11.591             | 12.670             | 12.012             | 13.079             |

**Table S15:** Cell parameter  $a$ -axis,  $b$ -axis and  $c$ -axis ( $\text{\AA}$ ) at different spin state for **4** (experimental), **4** (simulated) and **4-desolv** (simulated).

|                             | LS     |        |        | HS     |        |        |
|-----------------------------|--------|--------|--------|--------|--------|--------|
|                             | a axis | b axis | c axis | a axis | b axis | c axis |
| <b>4</b> (experimental)     | 12.27  | 12.40  | 12.76  | 11.93  | 12.68  | 13.14  |
| <b>4</b> (simulated)        | 12.29  | 12.48* | 12.79  | 12.14  | 12.37* | 13.14  |
| <b>4-desolv</b> (simulated) | 11.59  | 12.51* | 12.67  | 12.01  | 12.31* | 13.07  |

\*Simulated structures correspond to supercell (1x2x1), and therefore the values have been divided by 2.

**Table S16:** Angle between the ligands for **4** (experimental), **4** (simulated) and **4-desolv** (simulated).

|                             | LS    | HS    |
|-----------------------------|-------|-------|
|                             | angle | angle |
| <b>4</b> (experimental)     | 86.6° | 84.9° |
| <b>4</b> (simulated)        | 84.0° | 83.4° |
| <b>4-desolv</b> (simulated) | 89.4° | 78.5° |

## References

- 1 S. Hayami, Z. Z. Gu, H. Yoshiki, A. Fujishima and O. Sato, Iron(III) spin-crossover compounds with a wide apparent thermal hysteresis around room temperature, *J. Am. Chem. Soc.*, 2001, **123**, 11644–11650.
- 2 K. Takahashi, T. Sato, H. Mori, H. Tajima, Y. Einaga and O. Sato, Cooperative spin transition and thermally quenched high-spin state in new polymorph of  $[\text{Fe}(\text{qsal})_2]_3$ , *Hyperfine Interact.*, 2012, **206**, 1–5.
- 3 M. Nakaya, K. Shimayama, K. Takami, K. Hirata, A. S. Alao, M. Nakamura, L. F. Lindoy and S. Hayami, Spin-crossover and LIESST Effect for Iron(III) Complex Based on  $\pi$ - $\pi$  Stacking by Coordination Programming, *Chem. Lett.*, 2014, **43**, 1058–1060.
- 4 W. Phonsri, P. Harding, L. Liu, S. G. Telfer, K. S. Murray, B. Moubaraki, T. M. Ross, G. N. L. Jameson and D. J. Harding, Solvent modified spin crossover in an iron(III) complex: phase changes and an exceptionally wide hysteresis, *Chem. Sci.*, 2017, **8**, 3949–3959.
- 5 Z.-Y. Li, Y.-Y. Wu, Y. Li, J.-H. Wang, A. Sulaiman, M. K. Javed, Y.-C. Zhang, W. Li and X.-H. Bu, Slow Phase Transition-Induced Scan Rate Dependence of Spin Crossover in a Two-Dimensional Supramolecular Fe(III) Complex, *CCS Chem.*, 2022, 1–11.
- 6 S. Kang, Y. Shiota, A. Kariyazaki, S. Kanegawa, K. Yoshizawa and O. Sato, Frontispiece: Heterometallic Fe III /K Coordination Polymer with a Wide Thermal Hysteretic Spin Transition at Room Temperature, *Chem. - A Eur. J.*, 2016, **22**, 532.
- 7 N. Phukkaphan, D. L. Cruickshank, K. S. Murray, W. Phonsri, P. Harding and D. J. Harding, Hysteretic spin crossover driven by anion conformational change, *Chem. Commun.*, 2017, **53**, 9801–9804.
- 8 T. Boonprab, S. J. Lee, S. G. Telfer, K. S. Murray, W. Phonsri, G. Chastanet, E. Collet, E. Trzop, G. N. L. Jameson, P. Harding and D. J. Harding, The First Observation of Hidden Hysteresis in an Iron(III) Spin-Crossover Complex, *Angew. Chem. Int. Ed.*, 2019, **58**, 11811–11815.
- 9 W. Phonsri, Walailak University, 2014.
- 10 W. Phonsri, D. J. Harding, P. Harding, K. S. Murray, B. Moubaraki, I. A. Gass, J. D. Cashion, G. N. L. Jameson and H. Adams, Stepped spin crossover in Fe(III) halogen substituted quinolylsalicylaldimine complexes, *Dalton Trans.*, 2014, **43**, 17509–17518.
- 11 D. Sertphon, D. J. Harding, P. Harding, K. S. Murray, B. Moubaraki, J. D. Cashion and H. Adams, Anionic Tuning of Spin Crossover in Fe III –Quinolylsalicylaldiminate Complexes, *Eur. J. Inorg. Chem.*, 2013, **2013**, 788–795.
- 12 D. J. Harding, W. Phonsri, P. Harding, I. A. Gass, K. S. Murray, B. Moubaraki, J. D. Cashion, L. Liu and S. G. Telfer, Abrupt spin crossover in an iron(III) quinolylsalicylaldimine complex: structural insights and solvent effects, *Chem. Commun.*, 2013, **49**, 6340.
